# Supplementary material
Source: publisher figshare collection journal article supplement (https://acs.figshare.com/ndownloader/files/5711556)
Supplement: Supplementary file 1 [file 5711556]

# ic9806378.cif

data_global

_audit_creation_date              ?
_audit_creation_method            'CIFmaker on Quansan personal computer'
_audit_update_record              ?

_publ_contact_author
;
     Dr. Corrado Rizzoli
     Universit\'a di Parma
     Dipartimento di Chimica Generale ed Inorganica,
     Chimica Analitica, Chimica Fisica
     Viale delle Scienze 78
     I-43100 Parma
     Italy
;
_publ_contact_author_phone        '[039]521 905 449'
_publ_contact_author_fax          '[039]521 905 556'
_publ_contact_author_email        'rizzoli@at@ipruniv.cce.unipr.it'

_publ_section_title
;
  The Intra- and Inter-Molecular Oxidative Coupling of Ni(II)-meso-
  Octaethyl Mono(pyridine)-Tris(pyrrole) Complex Leading to C-C Bonds: 
  Pathways to Oligomeric Porphyrinogens'
;

_jounal_name_full   'Inorganic Chemistry'

######## Please note: paper accepted, not published ###########
 
loop_
    _publ_author_name
    _publ_author_address

     'Raffaella Crescenzi'
;    Institut de Chemie Minerale et Analytique
     Universite de Lausanne
     BCH
     CH-1015 Lausanne
     Switzerland
;
     'Euro Solari'
;    Institut de Chemie Minerale et Analytique
     Universite de Lausanne
     BCH
     CH-1015 Lausanne
     Switzerland
;
     'Carlo Floriani(*)'
;    Institut de Chemie Minerale et Analytique
     Universite de Lausanne
     BCH
     CH-1015 Lausanne
     Switzerland
;
     'Angiola Chiesi-Villa'
;    Dipartimento di Chimica Generale ed Inorganica,
     Chimica Analitica, Chimica Fisica
     Universit\'a di Parma
     Viale delle Scienze 78
     I-43100 Parma
     Italy
;
     'Corrado Rizzoli'
;    Dipartimento di Chimica Generale ed Inorganica,
     Chimica Analitica, Chimica Fisica
     Viale delle Scienze 78
     Universit\'a di Parma
     I-43100 Parma
     Italy
;

_publ_section_references
;
;

_publ_section_explt_prep
;

Belletti, D., Cantoni, A. & Pasquinelli, G. (1993)
 Gestione on-line di diffrattometro a cristallo singolo
 Siemens AED con personal computer. Centro di Studio per la
 Strutturistica Diffrattometrica del C.N.R.,Parma. Internal report 1/93.

North, A.C.T; Phillips, D.C; Mathews, F.S. (1968)
 Acta Cryst., A, Cryst. Phys., Diffr., Theor. Gen. Crystallogr.,
 A24, 351-359

Sheldrick, G.M. (1976). SHELX76, Programs for the solution
 of crystal structures. Univ. of Cambridge, England

Sheldrick, G.M. (1993). SHELXL93, Program for the crystal
 structure refinement. Univ. of  Gottingen, Germany

TEXSAN - TEXRAY Structure Analysis Package,
 Molecular Structure Corporation (1985).

;

_publ_section_explt_refinement
;

;

##############################################################################
####  Complex 5 Crystallographic Data

data_COMPLEX5

_chemical_name_common             ?
_chemical_formula_moiety          ?
_chemical_formula_structural      ?
_chemical_formula_analytical      ?
_chemical_formula_sum             'C53H81CoLiN4O4'
_chemical_formula_weight          904.12
_chemical_melting_point           ?
_chemical_compound_source         ?

loop_
 _atom_type_symbol
 _atom_type_description 
 _atom_type_scat_dispersion_real 
 _atom_type_scat_dispersion_imag 
 _atom_type_scat_source 
 'Co'  'Co'   0.3494   0.9721 
 'International Tables Vol C Tables 4.2.6.8 and 6.1.1.4' 
 'Li'  'Li'  -0.0003   0.0001 
 'International Tables Vol C Tables 4.2.6.8 and 6.1.1.4' 
 'O'  'O'   0.0106   0.0060 
 'International Tables Vol C Tables 4.2.6.8 and 6.1.1.4' 
 'N'  'N'   0.0061   0.0033 
 'International Tables Vol C Tables 4.2.6.8 and 6.1.1.4' 
 'C'  'C'   0.0033   0.0016 
 'International Tables Vol C Tables 4.2.6.8 and 6.1.1.4' 
 'H'  'H'   0.0000   0.0000 
 'International Tables Vol C Tables 4.2.6.8 and 6.1.1.4' 
 
_symmetry_cell_setting            orthorhombic
_symmetry_space_group_name_H-M    'P212121'

loop_
 _symmetry_equiv_pos_as_xyz
 'x, y, z' 
 '-x+1/2, -y, z+1/2' 
 '-x, y+1/2, -z+1/2' 
 'x+1/2, -y+1/2, -z' 
 
_cell_length_a                    16.320(5)
_cell_length_b                    20.671(6)
_cell_length_c                    15.276(4)
_cell_angle_alpha                 90.00(0)
_cell_angle_beta                  90.00(0)
_cell_angle_gamma                 90.00(0)
_cell_volume                      5153.(3)
_cell_formula_units_Z             4.00
_cell_measurement_temperature     25
_cell_measurement_reflns_used     295
_cell_measurement_theta_min       15.6
_cell_measurement_theta_max       18.0

_exptl_crystal_description        irregular_prism
_exptl_crystal_colour             tellow
_exptl_crystal_size_max           0.65
_exptl_crystal_size_mid           0.56
_exptl_crystal_size_min           0.22
_exptl_crystal_density_meas       not_measured
_exptl_crystal_density_diffrn     1.1653
_exptl_crystal_density_method     not_measured
_exptl_crystal_F_000              1956.0
_exptl_absorpt_coefficient_mu     0.3747
_exptl_absorpt_correction_type    'North et al. 1968'
_exptl_absorpt_correction_T_min   0.679
_exptl_absorpt_correction_T_max   1.000

_exptl_special_details
;
 ?
;

_diffrn_ambient_temperature       295
_diffrn_radiation_wavelength      0.71069
_diffrn_radiation_type            MoKa
_diffrn_radiation_source          'fine-focussealedtube'
_diffrn_radiation_monochromator   graphite
_diffrn_measurement_device        'Rigaku AFC6S'
_diffrn_measurement_method        'omega/2theta'
_diffrn_standards_number          3
_diffrn_standards_interval_count  150
_diffrn_standards_interval_time   ?
_diffrn_standards_decay_%         1.0
_diffrn_reflns_number             9187
_diffrn_reflns_av_R_equivalents   0.0879
_diffrn_reflns_av_sigmaI/netI     0.1951
_diffrn_reflns_limit_h_min        0
_diffrn_reflns_limit_h_max        17
_diffrn_reflns_limit_k_min        0
_diffrn_reflns_limit_k_max        24
_diffrn_reflns_limit_l_min        -18
_diffrn_reflns_limit_l_max        18
_diffrn_reflns_theta_min          1.59
_diffrn_reflns_theta_max          25.00
_reflns_number_total              8607
_reflns_number_observed           3061
_reflns_observed_criterion        >2sigma(I)

_computing_data_collection        'TEXSAN Software'
_computing_cell_refinement        'TEXSAN Software'
_computing_data_reduction         'TEXSAN Software'
_computing_structure_solution     'SHELXS-76 (Sheldrick, 1976)'
_computing_structure_refinement   'SHELXS-93 (Sheldrick, 1993)'
_computing_molecular_graphics     ?
_computing_publication_material   ?

_refine_special_details
;
 Refinement on F^2^ for ALL reflections except for 1979 with very negative F^2^ 
 or flagged by the user for potential systematic errors.  Weighted R-factors 
 wR and all goodnesses of fit S are based on F^2^, conventional R-factors R 
 are based on F, with F set to zero for negative F^2^. The observed criterion 
 of F^2^ > 2sigma(F^2^) is used only for calculating  R factor obs etc. and is 
 not relevant to the choice of reflections for refinement.  R-factors based 
 on F^2^ are statistically about twice as large as those based on F, and R- 
 factors based on ALL data will be even larger. 
; 

_refine_ls_structure_factor_coef  Fsqd
_refine_ls_matrix_type            full
_refine_ls_weighting_scheme 
 'calc w=1/[s^2^(Fo^2^)+( 0.1077P)^2^+0.0000P] where P=(Fo^2^+2Fc^2^)/3' 
_atom_sites_solution_primary      direct
_atom_sites_solution_secondary    difmap
_atom_sites_solution_hydrogens    difmap
_refine_ls_hydrogen_treatment     not_refined
_refine_ls_extinction_method      none
_refine_ls_extinction_coef        ?
_refine_ls_number_reflns          6628
_refine_ls_number_parameters      558
_refine_ls_number_restraints      166
_refine_ls_R_factor_all           0.2428
_refine_ls_R_factor_obs           0.0634
_refine_ls_wR_factor_all          0.3154
_refine_ls_wR_factor_obs          0.1561
_refine_ls_goodness_of_fit_all    0.925
_refine_ls_goodness_of_fit_obs    1.176
_refine_ls_restrained_S_all       1.363
_refine_ls_restrained_S_obs       1.178
_refine_ls_shift/esd_max          0.015
_refine_ls_shift/esd_mean         0.001

loop_
    _atom_site_label
    _atom_site_fract_x
    _atom_site_fract_y
    _atom_site_fract_z
    _atom_site_U_iso_or_equiv
    _atom_site_thermal_displace_type
    _atom_site_type_symbol
    _atom_site_calc_flag
    _atom_site_calc_attached_atom
    _atom_site_aniso_ratio
#
#  R=Rmax./Rmin.=ratio of the maximum and minimum
#                principal axes of atomic displacement ellipsoids
#
#                     Table of coordinates
#                     --------------------
#
#label    x/a         y/b         z/c        Ueq       tmf  typ .    att   R
 
 CO1    0.07928(6) -0.36597(5)  0.00558(8) 0.0494(3)  aniso Co  .   .     1.22
 N1     0.0369(4)  -0.3190(3)   0.1007(4)  0.0482(26) aniso N   .   .     2.22
 N2    -0.0229(4)  -0.4094(3)  -0.0065(6)  0.0534(22) aniso N   .   .     2.37
 N3     0.1182(4)  -0.4143(4)  -0.0894(4)  0.0595(29) aniso N   .   .     2.37
 N4     0.1848(4)  -0.3175(3)   0.0109(5)  0.0511(24) aniso N   .   .     1.46
 C1     0.0572(5)  -0.2560(4)   0.1179(6)  0.0601(36) aniso C   .   .     1.91
 C2     0.0104(6)  -0.2340(5)   0.1889(7)  0.0808(44) aniso C   .   .     3.06
 C3    -0.0367(6)  -0.2873(5)   0.2168(6)  0.0726(38) aniso C   .   .     2.57
 C4    -0.0214(6)  -0.3370(5)   0.1603(6)  0.0577(36) aniso C   .   .     1.65
 C5    -0.0589(5)  -0.4040(4)   0.1536(6)  0.0577(39) aniso C   .   .     1.74
 C6    -0.0802(7)  -0.4178(5)   0.0587(7)  0.0671(36) aniso C   .   .     2.14
 C7    -0.1516(6)  -0.4386(4)   0.0208(9)  0.0751(49) aniso C   .   .     3.74
 C8    -0.1392(8)  -0.4458(6)  -0.0694(8)  0.0917(57) aniso C   .   .     3.42
 C9    -0.0590(6)  -0.4258(5)  -0.0833(7)  0.0674(44) aniso C   .   .     3.27
 C10   -0.0147(7)  -0.4206(6)  -0.1701(7)  0.0811(51) aniso C   .   .     2.31
 C11    0.0736(7)  -0.4389(5)  -0.1594(6)  0.0756(40) aniso C   .   .     2.55
 C12    0.1286(9)  -0.4750(6)  -0.2116(7)  0.1048(55) aniso C   .   .     3.42
 C13    0.2056(8)  -0.4741(5)  -0.1715(7)  0.0904(50) aniso C   .   .     2.66
 C14    0.1957(6)  -0.4369(5)  -0.0957(6)  0.0611(37) aniso C   .   .     7.22
 C15    0.2565(5)  -0.4212(4)  -0.0220(5)  0.0562(33) aniso C   .   .     2.25
 C16    0.2582(5)  -0.3478(3)  -0.0122(6)  0.0495(28) aniso C   .   .     2.37
 C17    0.3271(6)  -0.3110(5)  -0.0287(5)  0.0658(38) aniso C   .   .     2.47
 C18    0.3288(6)  -0.2450(4)  -0.0171(7)  0.0688(41) aniso C   .   .     1.51
 C19    0.2582(5)  -0.2160(4)   0.0136(7)  0.0654(33) aniso C   .   .     2.29
 C20    0.1862(5)  -0.2516(4)   0.0280(5)  0.0560(34) aniso C   .   .     1.46
 C21    0.1077(6)  -0.2171(4)   0.0545(7)  0.0661(40) aniso C   .   .     2.45
 C22   -0.1363(6)  -0.4068(5)   0.2130(7)  0.0823(43) aniso C   .   .     2.70
 C23   -0.1745(8)  -0.4725(7)   0.2276(9)  0.1285(62) aniso C   .   .     3.13
 C24    0.0022(7)  -0.4570(5)   0.1838(7)  0.0761(46) aniso C   .   .     1.45
 C25    0.0326(9)  -0.4520(7)   0.2795(9)  0.1265(67) aniso C   .   .     2.25
 C26A  -0.0048(15) -0.3488(10) -0.2045(16) 0.1453(82) iso   C   .   .     7.84
 C27A  -0.0856(14) -0.3148(11) -0.2086(15) 0.1588(91) iso   C   .   .     4.33
 C26B  -0.0364(28) -0.3459(14) -0.1906(23) 0.0736(37) iso   C   .   .     2.35
 C27B   0.0087(19) -0.3219(15) -0.2732(19) 0.0993(54) iso   C   .   .     4.75
 C28   -0.0552(8)  -0.4629(11) -0.2422(8)  0.0643(36) aniso C   .   .     2.48
 C29   -0.0596(11) -0.5330(10) -0.2244(11) 0.0921(49) aniso C   .   .     1.62
 C30    0.3435(7)  -0.4503(4)  -0.0451(7)  0.0764(42) aniso C   .   .     2.32
 C31    0.4062(6)  -0.4485(5)   0.0302(8)  0.1276(63) aniso C   .   .     2.54
 C32    0.2234(6)  -0.4485(4)   0.0655(6)  0.1044(56) aniso C   .   .     5.25
 C33    0.2116(7)  -0.5222(5)   0.0629(7)  0.1486(81) aniso C   .   .     5.17
 C34    0.0571(6)  -0.2084(5)  -0.0314(6)  0.0936(66) aniso C   .   .     2.52
 C35    0.0906(9)  -0.1675(7)  -0.1005(8)  0.1100(30) aniso C   .   .     1.76
 C36    0.1258(8)  -0.1514(5)   0.0937(10) 0.1135(41) aniso C   .   .     2.02
 C37    0.1770(10) -0.1477(7)   0.1746(11) 0.1168(39) aniso C   .   .     2.00
 Li1   -0.2911(11) -0.2811(9)  -0.4905(13) 0.1755(79) aniso Li  .   .     2.13
 O1A   -0.4050(17) -0.3150(15) -0.4940(20) 0.1821(79) iso   O   .   .     2.94
 O1B   -0.3893(9)  -0.3271(8)  -0.4834(11) 0.1879(87) iso   O   .   .     2.82
 O2    -0.2042(5)  -0.3477(3)  -0.4876(6)  0.1868(90) aniso O   .   .     6.65
 O3    -0.2703(6)  -0.2221(5)  -0.3981(5)  0.1761(91) aniso O   .   .     3.08
 O4    -0.2822(6)  -0.2414(4)  -0.6051(6)  0.1869(93) aniso O   .   .     4.26
 C41A  -0.4536(18) -0.3202(15) -0.4124(19) 0.1695(86) iso   C   .   .     4.17
 C42A  -0.5279(21) -0.3627(21) -0.4328(24) 0.1534(79) iso   C   .   .     3.49
 C43A  -0.4929(16) -0.4053(13) -0.5069(22) 0.1580(79) iso   C   .   .     2.53
 C44A  -0.4353(19) -0.3614(17) -0.5609(18) 0.157(11)  iso   C   .   .     0.00
 C41B  -0.4146(17) -0.3844(10) -0.4331(16) 0.1247(85) iso   C   .   .     0.00
 C42B  -0.5076(18) -0.3873(20) -0.4469(28) 0.179(14)  iso   C   .   .     0.00
 C43B  -0.5239(24) -0.3453(20) -0.5287(23) 0.196(13)  iso   C   .   .     0.00
 C44B  -0.4652(15) -0.2900(15) -0.5024(29) 0.189(13)  iso   C   .   .     0.00
 C45A  -0.2221(22) -0.4165(18) -0.5133(27) 0.159(10)  iso   C   .   .     0.00
 C45B  -0.2087(19) -0.4106(16) -0.4438(20) 0.1202(81) iso   C   .   .     0.00
 C46   -0.1441(12) -0.4513(7)  -0.4860(17) 0.173(15)  aniso C   .   .     0.00
 C47   -0.0753(11) -0.4041(11) -0.5051(14) 0.158(15)  aniso C   .   .     0.00
 C48   -0.1200(11) -0.3373(9)  -0.5204(15) 0.147(13)  aniso C   .   .     0.00
 C49A  -0.2073(21) -0.2415(16) -0.3347(21) 0.1278(89) iso   C   .   .     0.00
 C49B  -0.1954(21) -0.2016(17) -0.3625(22) 0.1303(99) iso   C   .   .     0.00
 C50   -0.2133(15) -0.1736(10) -0.2731(11) 0.229(17)  aniso C   .   .     0.00
 C51   -0.2936(12) -0.1565(10) -0.2737(12) 0.172(16)  aniso C   .   .     0.00
 C52   -0.3270(12) -0.1767(9)  -0.3689(12) 0.217(18)  aniso C   .   .     0.00
 C53   -0.2984(13) -0.2695(8)  -0.6915(10) 0.262(18)  aniso C   .   .     0.00
 C54   -0.2155(12) -0.1751(8)  -0.7132(10) 0.238(17)  aniso C   .   .     0.00
 C55   -0.2668(12) -0.2262(9)  -0.7584(9)  0.212(17)  aniso C   .   .     0.00
 C56A  -0.2750(15) -0.1747(12) -0.6214(15) 0.1047(68) iso   C   .   .     0.00
 C56B  -0.2178(28) -0.1851(21) -0.6216(29) 0.137(12)  iso   C   .   .     0.00
 H2     0.00800(0) -0.19240(0)  0.21080(0) 0.1000(0)  iso   H   .   C2    1.00
 H3    -0.07040(0) -0.28810(0)  0.26420(0) 0.1000(0)  iso   H   .   C3    1.00
 H7    -0.20070(0) -0.44570(0)  0.05230(0) 0.1000(0)  iso   H   .   C7    1.00
 H8    -0.17490(0) -0.45880(0) -0.11430(0) 0.1000(0)  iso   H   .   C8    1.00
 H12    0.11920(0) -0.49560(0) -0.26510(0) 0.1000(0)  iso   H   .   C12   1.00
 H13    0.25550(0) -0.49450(0) -0.18780(0) 0.1000(0)  iso   H   .   C13   1.00
 H17    0.37450(0) -0.33290(0) -0.04750(0) 0.1000(0)  iso   H   .   C17   1.00
 H18    0.37580(0) -0.22090(0) -0.03340(0) 0.1000(0)  iso   H   .   C18   1.00
 H19    0.25860(0) -0.17390(0)  0.02600(0) 0.1000(0)  iso   H   .   C19   1.00
 H221  -0.17770(0) -0.37770(0)  0.18800(0) 0.1000(0)  iso   H   .   C22   1.00
 H222  -0.12160(0) -0.38830(0)  0.26970(0) 0.1000(0)  iso   H   .   C22   1.00
 H231  -0.22090(0) -0.46560(0)  0.26530(0) 0.1000(0)  iso   H   .   C23   1.00
 H232  -0.19140(0) -0.48780(0)  0.17240(0) 0.1000(0)  iso   H   .   C23   1.00
 H233  -0.13500(0) -0.49850(0)  0.25420(0) 0.1000(0)  iso   H   .   C23   1.00
 H241   0.04980(0) -0.45290(0)  0.14560(0) 0.1000(0)  iso   H   .   C24   1.00
 H242  -0.02270(0) -0.49750(0)  0.17400(0) 0.1000(0)  iso   H   .   C24   1.00
 H251   0.06980(0) -0.48640(0)  0.28730(0) 0.1000(0)  iso   H   .   C25   1.00
 H252   0.05680(0) -0.41120(0)  0.28740(0) 0.1000(0)  iso   H   .   C25   1.00
 H253  -0.01490(0) -0.45720(0)  0.31550(0) 0.1000(0)  iso   H   .   C25   1.00
 H281  -0.11070(0) -0.44600(0) -0.24980(0) 0.1000(0)  iso   H   .   C28   1.00
 H282  -0.02670(0) -0.45360(0) -0.29780(0) 0.1000(0)  iso   H   .   C28   1.00
 H291  -0.08490(0) -0.55390(0) -0.27590(0) 0.1000(0)  iso   H   .   C29   1.00
 H292  -0.00300(0) -0.54970(0) -0.22270(0) 0.1000(0)  iso   H   .   C29   1.00
 H293  -0.08730(0) -0.54200(0) -0.17460(0) 0.1000(0)  iso   H   .   C29   1.00
 H301   0.33560(0) -0.49360(0) -0.06570(0) 0.1000(0)  iso   H   .   C30   1.00
 H302   0.36490(0) -0.42490(0) -0.09490(0) 0.1000(0)  iso   H   .   C30   1.00
 H311   0.45660(0) -0.46710(0)  0.00790(0) 0.1000(0)  iso   H   .   C31   1.00
 H312   0.41530(0) -0.40510(0)  0.04710(0) 0.1000(0)  iso   H   .   C31   1.00
 H313   0.38580(0) -0.47380(0)  0.07660(0) 0.1000(0)  iso   H   .   C31   1.00
 H321   0.17240(0) -0.43050(0)  0.08030(0) 0.1000(0)  iso   H   .   C32   1.00
 H322   0.26270(0) -0.44030(0)  0.11190(0) 0.1000(0)  iso   H   .   C32   1.00
 H331   0.19140(0) -0.53720(0)  0.12120(0) 0.1000(0)  iso   H   .   C33   1.00
 H332   0.17300(0) -0.53470(0)  0.02050(0) 0.1000(0)  iso   H   .   C33   1.00
 H333   0.26310(0) -0.54450(0)  0.05360(0) 0.1000(0)  iso   H   .   C33   1.00
 H341   0.00440(0) -0.18830(0) -0.01280(0) 0.1000(0)  iso   H   .   C34   1.00
 H342   0.04350(0) -0.25040(0) -0.05340(0) 0.1000(0)  iso   H   .   C34   1.00
 H351   0.05420(0) -0.16490(0) -0.14940(0) 0.1000(0)  iso   H   .   C35   1.00
 H352   0.10420(0) -0.12530(0) -0.08020(0) 0.1000(0)  iso   H   .   C35   1.00
 H353   0.14210(0) -0.18780(0) -0.12200(0) 0.1000(0)  iso   H   .   C35   1.00
 H361   0.07390(0) -0.13080(0)  0.10850(0) 0.1000(0)  iso   H   .   C36   1.00
 H362   0.15250(0) -0.12470(0)  0.05130(0) 0.1000(0)  iso   H   .   C36   1.00
 H371   0.18290(0) -0.10280(0)  0.19450(0) 0.1000(0)  iso   H   .   C37   1.00
 H372   0.15160(0) -0.17130(0)  0.22310(0) 0.1000(0)  iso   H   .   C37   1.00
 H373   0.23070(0) -0.16500(0)  0.16560(0) 0.1000(0)  iso   H   .   C37   1.00

loop_
    _atom_site_aniso_label
    _atom_site_aniso_U_11
    _atom_site_aniso_U_22
    _atom_site_aniso_U_33
    _atom_site_aniso_U_23
    _atom_site_aniso_U_13
    _atom_site_aniso_U_12

#label   U11         U22         U33         U23         U13         U12

CO1   0.0509(6)   0.0518(5)   0.0454(5)  -0.0016(7)  -0.0002(7)   0.0033(6)
N1    0.0393(42)  0.0485(45)  0.0566(43)  0.0012(35)  0.0157(35) -0.0022(33)
N2    0.0472(40)  0.0503(37)  0.0627(45) -0.0116(47) -0.0142(50) -0.0066(31)
N3    0.0444(47)  0.0774(51)  0.0568(47) -0.0213(40)  0.0084(37) -0.0064(42)
N4    0.0453(41)  0.0466(37)  0.0615(47) -0.0038(42) -0.0027(42) -0.0017(30)
C1    0.0617(67)  0.0490(55)  0.0695(59) -0.0109(48)  0.0039(49)  0.0103(47)
C2    0.0640(71)  0.0746(75)  0.1038(82) -0.0344(63)  0.0198(61)  0.0026(58)
C3    0.0784(74)  0.0732(68)  0.0662(64) -0.0050(58)  0.0305(54) -0.0074(62)
C4    0.0523(63)  0.0659(63)  0.0548(56) -0.0122(49)  0.0052(51) -0.0032(51)
C5    0.0550(70)  0.0497(60)  0.0684(62)  0.0028(48)  0.0059(50)  0.0103(49)
C6    0.0685(75)  0.0442(56)  0.0887(71)  0.0052(48) -0.0097(72) -0.0018(63)
C7    0.046(6)    0.051(6)    0.128(12)   0.002(6)    0.002(7)   -0.014(4)
C8    0.0834(97)  0.0887(87)  0.1032(97) -0.0413(74) -0.0339(74)  0.0067(70)
C9    0.0481(74)  0.0690(70)  0.0851(81)  0.0049(60) -0.0249(58) -0.0162(52)
C10   0.0826(87)  0.1003(94)  0.0604(69) -0.0108(62) -0.0193(60)  0.0109(73)
C11   0.0851(76)  0.0814(70)  0.0604(58) -0.0257(52) -0.0128(66)  0.0062(69)
C12   0.129(11)   0.126(10)   0.059(7)   -0.035(7)   -0.012(8)   -0.006(9)
C13   0.0997(95)  0.0955(83)  0.0759(76) -0.0307(64)  0.0170(68)  0.0143(69)
C14   0.0710(76)  0.0636(63)  0.0487(58) -0.0330(50)  0.0297(54) -0.0072(54)
C15   0.0692(63)  0.0423(46)  0.0572(66) -0.0085(43)  0.0142(48)  0.0046(43)
C16   0.0459(46)  0.0516(48)  0.0510(51)  0.0177(47)  0.0124(47)  0.0065(37)
C17   0.0676(67)  0.0683(64)  0.0616(67)  0.0059(47)  0.0261(46)  0.0081(53)
C18   0.0680(63)  0.0677(61)  0.0706(81)  0.0026(61) -0.0011(60) -0.0134(47)
C19   0.0542(58)  0.0532(47)  0.0889(75) -0.0003(59)  0.0172(61) -0.0082(43)
C20   0.0578(64)  0.0449(48)  0.0652(67) -0.0003(46)  0.0006(43) -0.0011(46)
C21   0.0631(72)  0.0448(54)  0.0904(71) -0.0108(53)  0.0153(57)  0.0030(49)
C22   0.0718(76)  0.0788(70)  0.0962(78)  0.0092(61)  0.0303(60) -0.0142(60)
C23   0.118(11)   0.151(12)   0.117(11)   0.016(9)    0.055(9)   -0.020(10)
C24   0.0718(76)  0.0850(82)  0.0715(72)  0.0104(58)  0.0030(56)  0.0091(62)
C25   0.148(13)   0.142(12)   0.090(9)    0.034(9)    0.002(9)    0.011(10)
C28   0.104(12)   0.249(21)   0.083(9)   -0.047(12)  -0.053(8)    0.004(12)
C29   0.160(15)   0.158(15)   0.158(14)  -0.092(13)  -0.039(11)   0.007(12)
C30   0.0792(79)  0.0586(62)  0.0830(70) -0.0053(49)  0.0253(62)  0.0107(58)
C31   0.038(6)    0.112(8)    0.148(12)   0.035(8)    0.006(7)    0.012(6)
C32   0.0650(70)  0.0484(61)  0.0794(68)  0.0134(51)  0.0175(53) -0.0062(50)
C33   0.0923(87)  0.0888(84)  0.0950(82) -0.0045(65)  0.0201(64)  0.0066(67)
C34   0.0697(76)  0.0787(69)  0.0808(73)  0.0231(53)  0.0167(51)  0.0224(54)
C35   0.131(12)   0.150(13)   0.101(9)    0.038(9)    0.026(9)    0.040(10)
C36   0.093(9)    0.064(8)    0.156(12)  -0.035(8)    0.055(9)    0.006(7)
C37   0.167(15)   0.107(11)   0.172(14)  -0.081(11)   0.054(12)  -0.038(10)
Li1   0.101(13)   0.111(12)   0.068(11)  -0.013(12)   0.028(12)   0.012(10)
O2    0.1148(56)  0.0925(52)  0.1228(63)  0.0193(57)  0.0191(58)  0.0044(42)
O3    0.1244(77)  0.1340(80)  0.0821(55) -0.0191(54)  0.0102(52)  0.0133(64)
O4    0.1590(83)  0.0980(61)  0.0935(60)  0.0067(49)  0.0118(56) -0.0190(56)
C46   0.173(15)   0.116(11)   0.238(17)   0.007(15)   0.004(16)   0.014(11)
C47   0.158(15)   0.219(16)   0.169(13)   0.026(17)  -0.010(16)   0.081(13)
C48   0.147(13)   0.176(14)   0.240(19)  -0.014(15)   0.079(14)  -0.007(12)
C50   0.229(17)   0.210(16)   0.122(11)  -0.098(11)  -0.032(12)   0.097(14)
C51   0.172(16)   0.212(17)   0.145(13)  -0.070(13)   0.034(12)   0.018(14)
C52   0.217(18)   0.195(16)   0.149(14)  -0.083(12)  -0.020(13)   0.082(14)
C53   0.262(18)   0.164(14)   0.083(10)  -0.015(10)  -0.005(11)  -0.089(13)
C54   0.238(17)   0.122(11)   0.100(11)  -0.007(9)    0.043(11)  -0.067(12)
C55   0.212(17)   0.170(15)   0.093(10)   0.007(11)  -0.006(11)  -0.036(13)

loop_
_geom_bond_atom_site_label_1
_geom_bond_atom_site_label_2
_geom_bond_distance
_geom_bond_publ_flag
 
                      CO1   N1      1.880(6)   yes
                      CO1   N2      1.903(7)   yes
                      CO1   N3      1.873(7)   yes
                      CO1   N4      1.994(7)   yes
                      N1    C1      1.37(1)    yes
                      N1    C4      1.37(1)    yes
                      N2    C6      1.38(1)    yes
                      N2    C9      1.36(1)    yes
                      N3    C11     1.39(1)    yes
                      N3    C14     1.35(1)    yes
                      N4    C16     1.40(1)    yes
                      N4    C20     1.39(1)    yes
                      C1    C2      1.40(1)    yes
                      C1    C21     1.50(1)    yes
                      C2    C3      1.41(1)    yes
                      C3    C4      1.36(1)    yes
                      C4    C5      1.52(1)    yes
                      C5    C6      1.52(1)    yes
                      C5    C22     1.56(1)    yes
                      C5    C24     1.55(1)    yes
                      C6    C7      1.37(1)    yes
                      C7    C8      1.40(1)    yes
                      C8    C9      1.39(1)    yes
                      C9    C10     1.51(1)    yes
                      C10   C11     1.50(1)    yes
                      C10   C26A    1.58(2)    yes
                      C10   C26B    1.61(3)    yes
                      C10   C28     1.55(2)    yes
                      C11   C12     1.41(1)    yes
                      C12   C13     1.40(1)    yes
                      C13   C14     1.40(1)    yes
                      C14   C15     1.54(1)    yes
                      C15   C16     1.52(1)    yes
                      C15   C30     1.58(1)    yes
                      C15   C32     1.55(1)    yes
                      C16   C17     1.38(1)    yes
                      C17   C18     1.38(1)    yes
                      C18   C19     1.38(1)    yes
                      C19   C20     1.40(1)    yes
                      C20   C21     1.52(1)    yes
                      C21   C34     1.56(1)    yes
                      C21   C36     1.51(1)    yes
                      C22   C23     1.51(1)    yes
                      C24   C25     1.55(1)    yes
                      C26A  C27A    1.50(3)    yes
                      C26A  C26B    0.56(5)    yes
                      C26A  C27B    1.21(3)    yes
                      C27A  C26B    1.06(4)    yes
                      C27A  C27B    1.83(3)    yes
                      C26B  C27B    1.54(4)    yes
                      C28   C29     1.48(3)    yes
                      C30   C31     1.54(1)    yes
                      C32   C33     1.54(1)    yes
                      C34   C35     1.46(1)    yes
                      C36   C37     1.49(2)    yes
                      Li1   O1A     1.99(3)    yes
                      Li1   O1B     1.87(2)    yes
                      Li1   O2      1.98(2)    yes
                      Li1   O3      1.90(2)    yes
                      Li1   O4      1.94(2)    yes
                      O1A   O1B     0.39(3)    yes
                      O1A   C41A    1.48(4)    yes
                      O1A   C44A    1.49(4)    yes
                      O1A   C41B    1.72(3)    yes
                      O1A   C44B    1.12(3)    yes
                      O1B   C41A    1.52(3)    yes
                      O1B   C44A    1.57(3)    yes
                      O1B   C41B    1.47(2)    yes
                      O1B   C44B    1.49(3)    yes
                      O2    C45A    1.50(3)    yes
                      O2    C45B    1.46(3)    yes
                      O2    C48     1.48(2)    yes
                      O3    C49A    1.47(3)    yes
                      O3    C49B    1.40(3)    yes
                      O3    C52     1.39(2)    yes
                      O4    C53     1.47(1)    yes
                      O4    C56A    1.41(2)    yes
                      O4    C56B    1.59(4)    yes
                      C41A  C42A    1.53(4)    yes
                      C41A  C41B    1.51(3)    yes
                      C41A  C42B    1.73(4)    yes
                      C41A  C44B    1.52(5)    yes
                      C42A  C43A    1.54(4)    yes
                      C42A  C41B    1.90(4)    yes
                      C42A  C42B    0.64(5)    yes
                      C42A  C43B    1.51(5)    yes
                      C43A  C44A    1.55(4)    yes
                      C43A  C41B    1.76(3)    yes
                      C43A  C42B    1.02(5)    yes
                      C43A  C43B    1.38(4)    yes
                      C44A  C41B    2.04(3)    yes
                      C44A  C43B    1.56(5)    yes
                      C44A  C44B    1.79(4)    yes
                      C41B  C42B    1.53(4)    yes
                      C42B  C43B    1.54(5)    yes
                      C43B  C44B    1.54(5)    yes
                      C45A  C45B    1.09(5)    yes
                      C45A  C46     1.52(4)    yes
                      C45B  C46     1.49(3)    yes
                      C46   C47     1.52(2)    yes
                      C47   C48     1.58(2)    yes
                      C49A  C49B    0.95(4)    yes
                      C49A  C50     1.69(3)    yes
                      C49B  C50     1.51(3)    yes
                      C50   C51     1.36(3)    yes
                      C51   C52     1.61(2)    yes
                      C53   C55     1.45(2)    yes
                      C54   C55     1.51(2)    yes
                      C54   C56A    1.71(2)    yes
                      C54   C56B    1.41(4)    yes
                      C56A  C56B    0.96(5)    yes
 
loop_
_geom_angle_atom_site_label_1
_geom_angle_atom_site_label_2
_geom_angle_atom_site_label_3
_geom_angle
_geom_angle_publ_flag
 
                       N3    CO1   N4       90.4(3)  yes
                       N2    CO1   N4      176.3(3)  yes
                       N2    CO1   N3       88.3(3)  yes
                       N1    CO1   N4       91.5(3)  yes
                       N1    CO1   N3      178.1(3)  yes
                       N1    CO1   N2       89.8(3)  yes
                       CO1   N1    C4      129.0(6)  yes
                       CO1   N1    C1      123.4(5)  yes
                       C1    N1    C4      107.4(7)  yes
                       CO1   N2    C9      125.6(6)  yes
                       CO1   N2    C6      125.8(6)  yes
                       C6    N2    C9      107.4(8)  yes
                       CO1   N3    C14     123.8(6)  yes
                       CO1   N3    C11     127.8(6)  yes
                       C11   N3    C14     108.0(8)  yes
                       CO1   N4    C20     121.0(5)  yes
                       CO1   N4    C16     120.3(5)  yes
                       C16   N4    C20     118.3(6)  yes
                       N1    C1    C21     121.2(8)  yes
                       N1    C1    C2      109.0(7)  yes
                       C2    C1    C21     128.5(8)  yes
                       C1    C2    C3      106.1(9)  yes
                       C2    C3    C4      107.3(9)  yes
                       N1    C4    C3      110.1(8)  yes
                       C3    C4    C5      131.0(9)  yes
                       N1    C4    C5      118.9(8)  yes
                       C4    C5    C24     111.4(8)  yes
                       C4    C5    C22     108.8(7)  yes
                       C4    C5    C6      109.2(7)  yes
                       C22   C5    C24     108.8(8)  yes
                       C6    C5    C24     107.4(8)  yes
                       C6    C5    C22     111.3(8)  yes
                       N2    C6    C5      120.8(9)  yes
                       C5    C6    C7      131(1)    yes
                       N2    C6    C7      108(1)    yes
                       C6    C7    C8      109.0(9)  yes
                       C7    C8    C9      105(1)    yes
                       N2    C9    C8      110.6(9)  yes
                       C8    C9    C10     127(1)    yes
                       N2    C9    C10     122.2(9)  yes
                       C9    C10   C28     112(1)    yes
                       C9    C10   C26B     98(1)    yes
                       C9    C10   C26A    114(1)    yes
                       C9    C10   C11     110.2(9)  yes
                       C26B  C10   C28     108(2)    yes
                       C26A  C10   C28     110(1)    yes
                       C26A  C10   C26B     20(1)    yes
                       C11   C10   C28     110(1)    yes
                       C11   C10   C26B    118(1)    yes
                       C11   C10   C26A    100(1)    yes
                       N3    C11   C10     119.7(8)  yes
                       C10   C11   C12     133(1)    yes
                       N3    C11   C12     107.1(9)  yes
                       C11   C12   C13     108(1)    yes
                       C12   C13   C14     105(1)    yes
                       N3    C14   C13     110.9(9)  yes
                       C13   C14   C15     130.4(9)  yes
                       N3    C14   C15     118.7(8)  yes
                       C14   C15   C32     109.3(7)  yes
                       C14   C15   C30     109.6(7)  yes
                       C14   C15   C16     107.1(7)  yes
                       C30   C15   C32     111.5(7)  yes
                       C16   C15   C32     106.5(7)  yes
                       C16   C15   C30     112.6(7)  yes
                       N4    C16   C15     117.1(7)  yes
                       C15   C16   C17     123.0(7)  yes
                       N4    C16   C17     119.8(7)  yes
                       C16   C17   C18     122.6(9)  yes
                       C17   C18   C19     117.2(8)  yes
                       C18   C19   C20     121.6(8)  yes
                       N4    C20   C19     119.9(7)  yes
                       C19   C20   C21     120.1(7)  yes
                       N4    C20   C21     119.8(7)  yes
                       C1    C21   C20     112.5(7)  yes
                       C20   C21   C36     111.2(8)  yes
                       C20   C21   C34     106.0(7)  yes
                       C1    C21   C36     109.4(9)  yes
                       C1    C21   C34     108.2(8)  yes
                       C34   C21   C36     109.4(8)  yes
                       C5    C22   C23     117.0(9)  yes
                       C5    C24   C25     116.1(9)  yes
                       C10   C26A  C27B    138(2)    yes
                       C10   C26A  C26B     83(4)    yes
                       C10   C26A  C27A    111(2)    yes
                       C26B  C26A  C27B    117(5)    yes
                       C27A  C26A  C27B     85(2)    yes
                       C27A  C26A  C26B     32(4)    yes
                       C26A  C27A  C27B     41(1)    yes
                       C26A  C27A  C26B     16(2)    yes
                       C26B  C27A  C27B     57(2)    yes
                       C26A  C26B  C27A    131(6)    yes
                       C10   C26B  C27A    142(3)    yes
                       C10   C26B  C26A     77(4)    yes
                       C27A  C26B  C27B     87(3)    yes
                       C26A  C26B  C27B     44(4)    yes
                       C10   C26B  C27B    111(2)    yes
                       C27A  C27B  C26B     35(2)    yes
                       C26A  C27B  C26B     19(2)    yes
                       C26A  C27B  C27A     54(2)    yes
                       C10   C28   C29     116(1)    yes
                       C15   C30   C31     114.9(8)  yes
                       C15   C32   C33     112.5(8)  yes
                       C21   C34   C35     118.5(9)  yes
                       C21   C36   C37     119(1)    yes
                       O3    Li1   O4      113(1)    yes
                       O2    Li1   O4      105.1(9)  yes
                       O2    Li1   O3      107.6(9)  yes
                       O1B   Li1   O4      109(1)    yes
                       O1B   Li1   O3      116(1)    yes
                       O1B   Li1   O2      105(1)    yes
                       O1A   Li1   O4      101(1)    yes
                       O1A   Li1   O3      114(1)    yes
                       O1A   Li1   O2      115(1)    yes
                       O1A   Li1   O1B      11(1)    yes
                       Li1   O1A   C44B    131(3)    yes
                       Li1   O1A   C41B    111(2)    yes
                       Li1   O1A   C44A    124(2)    yes
                       Li1   O1A   C41A    120(2)    yes
                       Li1   O1A   O1B      67(5)    yes
                       C41B  O1A   C44B    112(3)    yes
                       C44A  O1A   C44B     86(3)    yes
                       C44A  O1A   C41B     79(2)    yes
                       C41A  O1A   C44B     70(2)    yes
                       C41A  O1A   C41B     56(2)    yes
                       C41A  O1A   C44A    111(3)    yes
                       O1B   O1A   C44B    156(6)    yes
                       O1B   O1A   C41B     46(4)    yes
                       O1B   O1A   C44A     95(5)    yes
                       O1B   O1A   C41A     87(5)    yes
                       Li1   O1B   O1A     102(5)    yes
                       O1A   O1B   C44B     18(5)    yes
                       O1A   O1B   C41B    123(5)    yes
                       O1A   O1B   C44A     70(5)    yes
                       O1A   O1B   C41A     78(5)    yes
                       Li1   O1B   C44B    116(2)    yes
                       Li1   O1B   C41B    133(2)    yes
                       Li1   O1B   C44A    127(2)    yes
                       Li1   O1B   C41A    126(2)    yes
                       C41B  O1B   C44B    106(2)    yes
                       C44A  O1B   C44B     72(2)    yes
                       C44A  O1B   C41B     84(2)    yes
                       C41A  O1B   C44B     61(2)    yes
                       C41A  O1B   C41B     61(2)    yes
                       C41A  O1B   C44A    105(2)    yes
                       Li1   O2    C48     124(1)    yes
                       Li1   O2    C45B    126(1)    yes
                       Li1   O2    C45A    121(2)    yes
                       C45B  O2    C48     109(1)    yes
                       C45A  O2    C48     103(2)    yes
                       C45A  O2    C45B     43(2)    yes
                       Li1   O3    C52     124(1)    yes
                       Li1   O3    C49B    130(2)    yes
                       Li1   O3    C49A    116(2)    yes
                       C49B  O3    C52     105(2)    yes
                       C49A  O3    C52     116(2)    yes
                       C49A  O3    C49B     38(2)    yes
                       Li1   O4    C56B    120(2)    yes
                       Li1   O4    C56A    126(1)    yes
                       Li1   O4    C53     129(1)    yes
                       C56A  O4    C56B     37(2)    yes
                       C53   O4    C56B    105(2)    yes
                       C53   O4    C56A    104(1)    yes
                       O1A   C41A  O1B      15(1)    yes
                       O1B   C41A  C44B     59(2)    yes
                       O1B   C41A  C42B     93(2)    yes
                       O1B   C41A  C41B     58(2)    yes
                       O1B   C41A  C42A    110(2)    yes
                       O1A   C41A  C44B     44(2)    yes
                       O1A   C41A  C42B     94(2)    yes
                       O1A   C41A  C41B     70(2)    yes
                       O1A   C41A  C42A    107(3)    yes
                       C42B  C41A  C44B     89(2)    yes
                       C41B  C41A  C44B    103(3)    yes
                       C41B  C41A  C42B     56(2)    yes
                       C42A  C41A  C44B     87(2)    yes
                       C42A  C41A  C42B     22(2)    yes
                       C42A  C41A  C41B     78(2)    yes
                       C41A  C42A  C43B     92(3)    yes
                       C41A  C42A  C42B     97(5)    yes
                       C41A  C42A  C41B     51(2)    yes
                       C41A  C42A  C43A    101(3)    yes
                       C42B  C42A  C43B     81(5)    yes
                       C41B  C42A  C43B     91(2)    yes
                       C41B  C42A  C42B     47(4)    yes
                       C43A  C42A  C43B     54(2)    yes
                       C43A  C42A  C42B     28(5)    yes
                       C43A  C42A  C41B     60(2)    yes
                       C42A  C43A  C43B     62(3)    yes
                       C42A  C43A  C42B     17(3)    yes
                       C42A  C43A  C41B     70(2)    yes
                       C42A  C43A  C44A    106(3)    yes
                       C42B  C43A  C43B     79(3)    yes
                       C41B  C43A  C43B    102(2)    yes
                       C41B  C43A  C42B     60(3)    yes
                       C44A  C43A  C43B     64(2)    yes
                       C44A  C43A  C42B    114(3)    yes
                       C44A  C43A  C41B     76(2)    yes
                       O1B   C44A  C43A     99(2)    yes
                       O1A   C44A  C43A    102(2)    yes
                       O1A   C44A  O1B      14(1)    yes
                       C43A  C44A  C44B     93(2)    yes
                       C43A  C44A  C43B     53(2)    yes
                       C43A  C44A  C41B     57(2)    yes
                       O1B   C44A  C44B     52(2)    yes
                       O1B   C44A  C43B     96(2)    yes
                       O1B   C44A  C41B     46(1)    yes
                       O1A   C44A  C44B     38(2)    yes
                       O1A   C44A  C43B     87(2)    yes
                       O1A   C44A  C41B     56(2)    yes
                       C43B  C44A  C44B     54(2)    yes
                       C41B  C44A  C44B     76(2)    yes
                       C41B  C44A  C43B     84(2)    yes
                       C43A  C41B  C44A     47(1)    yes
                       C42A  C41B  C44A     78(2)    yes
                       C42A  C41B  C43A     50(2)    yes
                       C41A  C41B  C44A     86(2)    yes
                       C41A  C41B  C43A     93(2)    yes
                       C41A  C41B  C42A     52(2)    yes
                       O1B   C41B  C44A     50(1)    yes
                       O1B   C41B  C43A     94(2)    yes
                       O1B   C41B  C42A     95(2)    yes
                       O1B   C41B  C41A     61(2)    yes
                       O1A   C41B  C44A     46(1)    yes
                       O1A   C41B  C43A     86(2)    yes
                       O1A   C41B  C42A     84(2)    yes
                       O1A   C41B  C41A     54(2)    yes
                       O1A   C41B  O1B      11(1)    yes
                       C44A  C41B  C42B     73(2)    yes
                       C43A  C41B  C42B     35(2)    yes
                       C42A  C41B  C42B     18(2)    yes
                       C41A  C41B  C42B     69(2)    yes
                       O1B   C41B  C42B    104(2)    yes
                       O1A   C41B  C42B     93(2)    yes
                       C43A  C42B  C41B     85(3)    yes
                       C42A  C42B  C41B    116(6)    yes
                       C42A  C42B  C43A    135(6)    yes
                       C41A  C42B  C41B     55(2)    yes
                       C41A  C42B  C43A    117(3)    yes
                       C41A  C42B  C42A     62(4)    yes
                       C41B  C42B  C43B    105(2)    yes
                       C43A  C42B  C43B     61(3)    yes
                       C42A  C42B  C43B     75(5)    yes
                       C41A  C42B  C43B     83(2)    yes
                       C44A  C43B  C42B     89(3)    yes
                       C43A  C43B  C42B     40(2)    yes
                       C43A  C43B  C44A     63(2)    yes
                       C42A  C43B  C42B     24(2)    yes
                       C42A  C43B  C44A    107(3)    yes
                       C42A  C43B  C43A     64(3)    yes
                       C42B  C43B  C44B     96(3)    yes
                       C44A  C43B  C44B     70(2)    yes
                       C43A  C43B  C44B    112(3)    yes
                       C42A  C43B  C44B     87(3)    yes
                       C44A  C44B  C43B     55(2)    yes
                       C41A  C44B  C43B     90(3)    yes
                       C41A  C44B  C44A     95(3)    yes
                       O1B   C44B  C43B    101(2)    yes
                       O1B   C44B  C44A     56(2)    yes
                       O1B   C44B  C41A     61(2)    yes
                       O1A   C44B  C43B    103(3)    yes
                       O1A   C44B  C44A     56(2)    yes
                       O1A   C44B  C41A     66(2)    yes
                       O1A   C44B  O1B       6(2)    yes
                       O2    C45A  C46     102(2)    yes
                       O2    C45A  C45B     67(3)    yes
                       C45B  C45A  C46      68(3)    yes
                       O2    C45B  C45A     70(3)    yes
                       C45A  C45B  C46      70(3)    yes
                       O2    C45B  C46     106(2)    yes
                       C45A  C46   C45B     42(2)    yes
                       C45B  C46   C47     104(2)    yes
                       C45A  C46   C47     105(2)    yes
                       C46   C47   C48     104(1)    yes
                       O2    C48   C47     105(1)    yes
                       O3    C49A  C50      96(2)    yes
                       O3    C49A  C49B     67(3)    yes
                       C49B  C49A  C50      63(3)    yes
                       O3    C49B  C49A     74(3)    yes
                       C49A  C49B  C50      84(3)    yes
                       O3    C49B  C50     107(2)    yes
                       C49A  C50   C49B     34(2)    yes
                       C49B  C50   C51     106(2)    yes
                       C49A  C50   C51     106(2)    yes
                       C50   C51   C52     105(2)    yes
                       O3    C52   C51     104(1)    yes
                       O4    C53   C55     109(1)    yes
                       C56A  C54   C56B     34(2)    yes
                       C55   C54   C56B    110(2)    yes
                       C55   C54   C56A     94(1)    yes
                       C53   C55   C54     108(1)    yes
                       O4    C56A  C54     101(2)    yes
                       C54   C56A  C56B     56(3)    yes
                       O4    C56A  C56B     82(3)    yes
                       C54   C56B  C56A     90(4)    yes
                       O4    C56B  C56A     61(3)    yes
                       O4    C56B  C54     106(3)    yes
 
_refine_diff_density_max          0.278
_refine_diff_density_min          -0.384
_refine_diff_density_rms          0.061


data_COMPLEX7

_chemical_name_common             ?
_chemical_formula_moiety          ?
_chemical_formula_structural      ?
_chemical_formula_analytical      ?
_chemical_formula_sum             'C45H65CuLiN4O2'
_chemical_formula_weight          764.52
_chemical_melting_point           ?
_chemical_compound_source         ?

loop_
 _atom_type_symbol
 _atom_type_description 
 _atom_type_scat_dispersion_real 
 _atom_type_scat_dispersion_imag 
 _atom_type_scat_source 
 'Cu'  'Cu'  -1.9646   0.5888 
 'International Tables Vol C Tables 4.2.6.8 and 6.1.1.4' 
 'Li'  'Li'   0.0008   0.0003 
 'International Tables Vol C Tables 4.2.6.8 and 6.1.1.4' 
 'O'  'O'   0.0492   0.0322 
 'International Tables Vol C Tables 4.2.6.8 and 6.1.1.4' 
 'N'  'N'   0.0311   0.0180 
 'International Tables Vol C Tables 4.2.6.8 and 6.1.1.4' 
 'C'  'C'   0.0181   0.0091 
 'International Tables Vol C Tables 4.2.6.8 and 6.1.1.4' 
 'H'  'H'   0.0000   0.0000 
 'International Tables Vol C Tables 4.2.6.8 and 6.1.1.4' 
 
_symmetry_cell_setting            monoclinic
_symmetry_space_group_name_H-M    'P21/N'

loop_
 _symmetry_equiv_pos_as_xyz
 'x, y, z' 
 '-x+1/2, y+1/2, -z+1/2' 
 '-x, -y, -z' 
 'x-1/2, -y-1/2, z-1/2' 
 
_cell_length_a                    12.043(3)
_cell_length_b                    19.010(5)
_cell_length_c                    19.147(2)
_cell_angle_alpha                 90.00(0)
_cell_angle_beta                  100.66(1)
_cell_angle_gamma                 90.00(0)
_cell_volume                      4308.(2)
_cell_formula_units_Z             4.00
_cell_measurement_temperature     25
_cell_measurement_reflns_used     295
_cell_measurement_theta_min       62.5
_cell_measurement_theta_max       74.7

_exptl_crystal_description        irregular_prism
_exptl_crystal_colour             red
_exptl_crystal_size_max           0.34
_exptl_crystal_size_mid           0.23
_exptl_crystal_size_min           0.18
_exptl_crystal_density_meas       not_measured
_exptl_crystal_density_diffrn     1.1788
_exptl_crystal_density_method     not_measured
_exptl_crystal_F_000              1644.0
_exptl_absorpt_coefficient_mu     0.9770
_exptl_absorpt_correction_type    'North et al. 1968'
_exptl_absorpt_correction_T_min   0.875
_exptl_absorpt_correction_T_max   1.000

_exptl_special_details
;
 ?
;

_diffrn_ambient_temperature       295
_diffrn_radiation_wavelength      1.54178
_diffrn_radiation_type            CuKa
_diffrn_radiation_source          'fine-focussealedtube'
_diffrn_radiation_monochromator   graphite
_diffrn_measurement_device        'Rigaku AFC6S'
_diffrn_measurement_method        'omega/2theta'
_diffrn_standards_number          3
_diffrn_standards_interval_count  150
_diffrn_standards_interval_time   ?
_diffrn_standards_decay_%         3.0
_diffrn_reflns_number             8536
_diffrn_reflns_av_R_equivalents   0.0512
_diffrn_reflns_av_sigmaI/netI     85.8783
_diffrn_reflns_limit_h_min        -14
_diffrn_reflns_limit_h_max        14
_diffrn_reflns_limit_k_min        -13
_diffrn_reflns_limit_k_max        23
_diffrn_reflns_limit_l_min        -23
_diffrn_reflns_limit_l_max        22
_diffrn_reflns_theta_min          3.30
_diffrn_reflns_theta_max          70.20
_reflns_number_total              8129
_reflns_number_observed           3656
_reflns_observed_criterion        >2sigma(I)

_computing_data_collection        'TEXSAN Software'
_computing_cell_refinement        'TEXSAN Software'
_computing_data_reduction         'TEXSAN Software'
_computing_structure_solution     'SHELXS-76 (Sheldrick, 1976)'
_computing_structure_refinement   'SHELXS-93 (Sheldrick, 1993)'
_computing_molecular_graphics     ?
_computing_publication_material   ?

_refine_special_details
;
 Refinement on F^2^ for ALL reflections except for 1462 with very negative F^2^ 
 or flagged by the user for potential systematic errors.  Weighted R-factors 
 wR and all goodnesses of fit S are based on F^2^, conventional R-factors R 
 are based on F, with F set to zero for negative F^2^. The observed criterion 
 of F^2^ > 2sigma(F^2^) is used only for calculating  R factor obs etc. and is 
 not relevant to the choice of reflections for refinement.  R-factors based 
 on F^2^ are statistically about twice as large as those based on F, and R- 
 factors based on ALL data will be even larger. 
; 

_refine_ls_structure_factor_coef  Fsqd
_refine_ls_matrix_type            full
_refine_ls_weighting_scheme 
 'calc w=1/[s^2^(Fo^2^)+( 0.1177P)^2^+0.0000P] where P=(Fo^2^+2Fc^2^)/3' 
_atom_sites_solution_primary      direct
_atom_sites_solution_secondary    difmap
_atom_sites_solution_hydrogens    difmap
_refine_ls_hydrogen_treatment     not_refined
_refine_ls_extinction_method      none
_refine_ls_extinction_coef        ?
_refine_ls_number_reflns          6667
_refine_ls_number_parameters      472
_refine_ls_number_restraints      102
_refine_ls_R_factor_all           0.1635
_refine_ls_R_factor_obs           0.0603
_refine_ls_wR_factor_all          0.2184
_refine_ls_wR_factor_obs          0.1603
_refine_ls_goodness_of_fit_all    0.974
_refine_ls_goodness_of_fit_obs    1.122
_refine_ls_restrained_S_all       1.009
_refine_ls_restrained_S_obs       1.117
_refine_ls_shift/esd_max          0.010
_refine_ls_shift/esd_mean         0.000

loop_
    _atom_site_label
    _atom_site_fract_x
    _atom_site_fract_y
    _atom_site_fract_z
    _atom_site_U_iso_or_equiv
    _atom_site_thermal_displace_type
    _atom_site_type_symbol
    _atom_site_calc_flag
    _atom_site_calc_attached_atom
    _atom_site_aniso_ratio
#
#  R=Rmax./Rmin.=ratio of the maximum and minimum
#                principal axes of atomic displacement ellipsoids
#
#                     Table of coordinates
#                     --------------------
#
#label    x/a         y/b         z/c        Ueq       tmf  typ .    att   R
 
 CU1    0.00965(5)  0.08532(3)  0.29456(3) 0.0511(2)  aniso Cu  .   .     1.87
 LI1   -0.1874(9)   0.1011(7)   0.0823(6)  0.1008(49) aniso Li  .   .     1.81
 O1    -0.2953(4)   0.1553(3)   0.1188(2)  0.1075(18) aniso O   .   .     2.64
 O2    -0.2507(5)   0.1056(4)  -0.0216(3)  0.1339(26) aniso O   .   .     1.98
 N1     0.1492(3)   0.1234(2)   0.2825(2)  0.0619(14) aniso N   .   .     2.18
 N2    -0.0312(3)   0.0655(2)   0.1931(2)  0.0578(14) aniso N   .   .     1.83
 N3    -0.1330(3)   0.0500(2)   0.3060(2)  0.0541(12) aniso N   .   .     1.79
 N4     0.0534(3)   0.1012(2)   0.4058(2)  0.0526(12) aniso N   .   .     1.83
 C1     0.2437(4)   0.1276(3)   0.3350(2)  0.0698(19) aniso C   .   .     3.07
 C2     0.3223(5)   0.1683(4)   0.3103(3)  0.1003(29) aniso C   .   .     3.45
 C3     0.2775(5)   0.1887(4)   0.2403(3)  0.0979(25) aniso C   .   .     3.04
 C4     0.1707(4)   0.1593(3)   0.2243(2)  0.0723(20) aniso C   .   .     2.26
 C5     0.0824(5)   0.1650(3)   0.1564(2)  0.0744(21) aniso C   .   .     2.44
 C6     0.0173(4)   0.0965(3)   0.1413(2)  0.0608(17) aniso C   .   .     2.14
 C7    -0.0145(5)   0.0576(3)   0.0787(2)  0.0749(22) aniso C   .   .     2.83
 C8    -0.0802(5)   0.0022(3)   0.0945(2)  0.0773(21) aniso C   .   .     2.94
 C9    -0.0909(4)   0.0074(3)   0.1649(2)  0.0631(17) aniso C   .   .     1.85
 C10   -0.1460(4)  -0.0421(3)   0.2109(3)  0.0693(19) aniso C   .   .     2.16
 C11   -0.1963(4)  -0.0026(3)   0.2664(2)  0.0605(16) aniso C   .   .     2.20
 C12   -0.2940(4)  -0.0109(3)   0.2910(3)  0.0739(19) aniso C   .   .     2.23
 C13   -0.2962(4)   0.0394(3)   0.3457(3)  0.0726(20) aniso C   .   .     2.29
 C14   -0.1956(4)   0.0752(3)   0.3527(2)  0.0601(17) aniso C   .   .     2.16
 C15   -0.1464(4)   0.1351(3)   0.4013(2)  0.0621(17) aniso C   .   .     1.64
 C16   -0.0307(4)   0.1088(2)   0.4432(2)  0.0539(14) aniso C   .   .     1.52
 C17   -0.0137(4)   0.0952(3)   0.5152(2)  0.0667(18) aniso C   .   .     1.86
 C18    0.0911(4)   0.0733(3)   0.5494(2)  0.0691(20) aniso C   .   .     2.29
 C19    0.1762(4)   0.0688(3)   0.5130(2)  0.0667(18) aniso C   .   .     2.12
 C20    0.1582(4)   0.0845(3)   0.4402(2)  0.0591(14) aniso C   .   .     2.17
 C21    0.2533(4)   0.0789(3)   0.3988(2)  0.0716(20) aniso C   .   .     2.75
 C22    0.1382(6)   0.1850(4)   0.0932(3)  0.1054(30) aniso C   .   .     4.03
 C23    0.2257(7)   0.1371(6)   0.0761(4)  0.1380(41) aniso C   .   .     4.73
 C24   -0.0054(6)   0.2220(3)   0.1652(3)  0.0895(26) aniso C   .   .     2.25
 C25    0.0396(8)   0.2937(4)   0.1893(5)  0.1429(40) aniso C   .   .     2.15
 C26   -0.2388(6)  -0.0862(3)   0.1628(3)  0.0928(25) aniso C   .   .     2.95
 C27   -0.3356(6)  -0.0455(4)   0.1187(4)  0.1114(27) aniso C   .   .     3.43
 C28   -0.0575(6)  -0.0936(3)   0.2519(3)  0.0881(24) aniso C   .   .     2.10
 C29    0.0074(8)  -0.1357(5)   0.2082(5)  0.1461(46) aniso C   .   .     2.09
 C30   -0.2269(5)   0.1535(3)   0.4542(3)  0.0790(20) aniso C   .   .     2.00
 C31   -0.3348(5)   0.1937(4)   0.4196(4)  0.1093(31) aniso C   .   .     2.79
 C32   -0.1265(4)   0.2010(3)   0.3583(2)  0.0663(18) aniso C   .   .     1.80
 C33   -0.0695(6)   0.2614(3)   0.4020(4)  0.0968(25) aniso C   .   .     2.04
 C34    0.2522(6)   0.0020(4)   0.3725(3)  0.0945(24) aniso C   .   .     2.40
 C35    0.3376(9)  -0.0145(5)   0.3247(4)  0.1549(48) aniso C   .   .     3.12
 C36    0.3705(5)   0.0924(5)   0.4490(3)  0.1077(31) aniso C   .   .     4.60
 C37    0.3796(7)   0.1629(6)   0.4863(4)  0.1488(42) aniso C   .   .     5.45
 C41   -0.3188(8)   0.1530(5)   0.1885(4)  0.1327(36) aniso C   .   .     3.29
 C43   -0.4570(9)   0.2256(7)   0.1195(5)  0.1754(52) aniso C   .   .     3.58
 C42A  -0.4100(14)  0.1999(9)   0.1963(8)  0.1073(44) iso   C   .   .     0.00
 C44A  -0.3386(15)  0.2295(10)  0.0947(9)  0.1152(47) iso   C   .   .     0.00
 C42B  -0.4456(16)  0.1616(10)  0.1788(10) 0.1278(55) iso   C   .   .     0.00
 C44B  -0.3839(14)  0.1958(9)   0.0738(8)  0.1037(42) iso   C   .   .     0.00
 C45A  -0.3171(23)  0.0447(11) -0.0549(14) 0.198(11)  iso   C   .   .     0.00
 C46A  -0.3427(22)  0.0430(14) -0.1364(14) 0.210(10)  iso   C   .   .     0.00
 C47A  -0.2540(16)  0.0992(12) -0.1440(10) 0.1586(72) iso   C   .   .     0.00
 C48A  -0.1815(12)  0.1243(10) -0.0739(7)  0.1196(49) iso   C   .   .     0.00
 C45B  -0.3574(11)  0.0734(9)  -0.0557(7)  0.1151(52) iso   C   .   .     0.00
 C46B  -0.3548(14)  0.0908(9)  -0.1341(8)  0.1170(48) iso   C   .   .     0.00
 C47B  -0.2742(16)  0.1542(10) -0.1301(11) 0.1560(69) iso   C   .   .     0.00
 C48B  -0.2075(20)  0.1679(10) -0.0556(10) 0.1861(86) iso   C   .   .     0.00
 H2     0.39710(0)  0.17890(0)  0.33000(0) 0.1200(0)  iso   H   .   C2    1.00
 H3     0.31640(0)  0.22120(0)  0.20320(0) 0.1200(0)  iso   H   .   C3    1.00
 H7     0.01620(0)  0.07650(0)  0.04410(0) 0.1200(0)  iso   H   .   C7    1.00
 H8    -0.10540(0) -0.03650(0)  0.06140(0) 0.1200(0)  iso   H   .   C8    1.00
 H12   -0.36050(0) -0.05070(0)  0.27640(0) 0.1200(0)  iso   H   .   C12   1.00
 H13   -0.37080(0)  0.04260(0)  0.37280(0) 0.1200(0)  iso   H   .   C13   1.00
 H17   -0.07450(0)  0.09970(0)  0.54230(0) 0.1200(0)  iso   H   .   C17   1.00
 H18    0.09010(0)  0.06160(0)  0.60440(0) 0.1200(0)  iso   H   .   C18   1.00
 H19    0.25400(0)  0.05400(0)  0.53210(0) 0.1200(0)  iso   H   .   C19   1.00
 H221   0.17950(0)  0.23750(0)  0.09770(0) 0.1200(0)  iso   H   .   C22   1.00
 H222   0.07760(0)  0.20020(0)  0.04430(0) 0.1200(0)  iso   H   .   C22   1.00
 H231   0.25400(0)  0.15560(0)  0.03610(0) 0.1200(0)  iso   H   .   C23   1.00
 H232   0.19340(0)  0.09180(0)  0.06490(0) 0.1200(0)  iso   H   .   C23   1.00
 H233   0.28620(0)  0.13410(0)  0.11630(0) 0.1200(0)  iso   H   .   C23   1.00
 H241  -0.05830(0)  0.20290(0)  0.19980(0) 0.1200(0)  iso   H   .   C24   1.00
 H242  -0.06610(0)  0.23500(0)  0.11440(0) 0.1200(0)  iso   H   .   C24   1.00
 H251  -0.02010(0)  0.32420(0)  0.19300(0) 0.1200(0)  iso   H   .   C25   1.00
 H252   0.08370(0)  0.31160(0)  0.15570(0) 0.1200(0)  iso   H   .   C25   1.00
 H253   0.08930(0)  0.28820(0)  0.23490(0) 0.1200(0)  iso   H   .   C25   1.00
 H261  -0.20600(0) -0.11610(0)  0.12800(0) 0.1200(0)  iso   H   .   C26   1.00
 H262  -0.27670(0) -0.12100(0)  0.19910(0) 0.1200(0)  iso   H   .   C26   1.00
 H271  -0.38850(0) -0.07710(0)  0.09140(0) 0.1200(0)  iso   H   .   C27   1.00
 H272  -0.30810(0) -0.01280(0)  0.08830(0) 0.1200(0)  iso   H   .   C27   1.00
 H273  -0.37530(0) -0.01930(0)  0.15070(0) 0.1200(0)  iso   H   .   C27   1.00
 H281  -0.08960(0) -0.14510(0)  0.27590(0) 0.1200(0)  iso   H   .   C28   1.00
 H282   0.03360(0) -0.07810(0)  0.28070(0) 0.1200(0)  iso   H   .   C28   1.00
 H291   0.06160(0) -0.16470(0)  0.23830(0) 0.1200(0)  iso   H   .   C29   1.00
 H292   0.04910(0) -0.10390(0)  0.18210(0) 0.1200(0)  iso   H   .   C29   1.00
 H293  -0.04190(0) -0.16370(0)  0.17520(0) 0.1200(0)  iso   H   .   C29   1.00
 H301  -0.24620(0)  0.10630(0)  0.47440(0) 0.1200(0)  iso   H   .   C30   1.00
 H302  -0.18350(0)  0.19150(0)  0.49580(0) 0.1200(0)  iso   H   .   C30   1.00
 H311  -0.39190(0)  0.19530(0)  0.44430(0) 0.1200(0)  iso   H   .   C31   1.00
 H312  -0.36450(0)  0.17170(0)  0.37050(0) 0.1200(0)  iso   H   .   C31   1.00
 H313  -0.30970(0)  0.23760(0)  0.40630(0) 0.1200(0)  iso   H   .   C31   1.00
 H321  -0.08020(0)  0.18660(0)  0.32110(0) 0.1200(0)  iso   H   .   C32   1.00
 H322  -0.20120(0)  0.21880(0)  0.32750(0) 0.1200(0)  iso   H   .   C32   1.00
 H331  -0.05900(0)  0.29930(0)  0.37020(0) 0.1200(0)  iso   H   .   C33   1.00
 H332   0.00480(0)  0.24580(0)  0.42570(0) 0.1200(0)  iso   H   .   C33   1.00
 H333  -0.11230(0)  0.27630(0)  0.43530(0) 0.1200(0)  iso   H   .   C33   1.00
 H341   0.17430(0) -0.01390(0)  0.34230(0) 0.1200(0)  iso   H   .   C34   1.00
 H342   0.26620(0) -0.03370(0)  0.41320(0) 0.1200(0)  iso   H   .   C34   1.00
 H351   0.32830(0) -0.06520(0)  0.31240(0) 0.1200(0)  iso   H   .   C35   1.00
 H352   0.41090(0) -0.00750(0)  0.35060(0) 0.1200(0)  iso   H   .   C35   1.00
 H353   0.32050(0)  0.01220(0)  0.28350(0) 0.1200(0)  iso   H   .   C35   1.00
 H361   0.43800(0)  0.09710(0)  0.41630(0) 0.1200(0)  iso   H   .   C36   1.00
 H362   0.39210(0)  0.05550(0)  0.48770(0) 0.1200(0)  iso   H   .   C36   1.00
 H371   0.45390(0)  0.16460(0)  0.51640(0) 0.1200(0)  iso   H   .   C37   1.00
 H372   0.32360(0)  0.16430(0)  0.51620(0) 0.1200(0)  iso   H   .   C37   1.00
 H373   0.37020(0)  0.19870(0)  0.45300(0) 0.1200(0)  iso   H   .   C37   1.00

loop_
    _atom_site_aniso_label
    _atom_site_aniso_U_11
    _atom_site_aniso_U_22
    _atom_site_aniso_U_33
    _atom_site_aniso_U_23
    _atom_site_aniso_U_13
    _atom_site_aniso_U_12

#label   U11         U22         U33         U23         U13         U12

CU1   0.0531(4)   0.0614(4)   0.0362(3)   0.0005(3)   0.0012(2)  -0.0049(3)
LI1   0.083(7)    0.135(10)   0.085(7)    0.004(6)    0.017(6)    0.017(7)
O1    0.1035(32)  0.1419(41)  0.0742(25)  0.0214(26)  0.0088(23)  0.0363(29)
O2    0.1191(39)  0.1789(54)  0.1006(34)  0.0219(35)  0.0119(30)  0.0051(37)
N1    0.0590(23)  0.0847(28)  0.0408(18)  0.0013(18)  0.0059(16) -0.0095(21)
N2    0.0646(24)  0.0674(25)  0.0394(18) -0.0028(16)  0.0047(16) -0.0043(18)
N3    0.0532(21)  0.0650(23)  0.0418(17)  0.0058(16)  0.0032(15) -0.0064(18)
N4    0.0519(20)  0.0632(25)  0.0396(16) -0.0015(15)  0.0001(15) -0.0058(17)
C1    0.0459(25)  0.1158(43)  0.0454(23) -0.0100(26)  0.0022(19) -0.0093(27)
C2    0.0667(35)  0.1661(68)  0.0642(32) -0.0001(38)  0.0018(27) -0.0344(40)
C3    0.0844(40)  0.1464(59)  0.0624(32)  0.0107(36)  0.0125(28) -0.0411(40)
C4    0.0699(31)  0.0958(39)  0.0495(25)  0.0034(25)  0.0070(22) -0.0235(29)
C5    0.0844(37)  0.0933(40)  0.0460(24)  0.0121(25)  0.0135(24) -0.0086(32)
C6    0.0636(27)  0.0797(35)  0.0392(20) -0.0038(21)  0.0100(19) -0.0069(25)
C7    0.0843(37)  0.1028(42)  0.0369(22) -0.0006(24)  0.0092(23) -0.0048(32)
C8    0.0930(39)  0.0889(39)  0.0456(24) -0.0220(25)  0.0016(25) -0.0114(32)
C9    0.0699(30)  0.0660(30)  0.0483(22) -0.0062(22) -0.0019(22) -0.0018(25)
C10   0.0776(33)  0.0617(31)  0.0609(27) -0.0054(24) -0.0079(24) -0.0097(26)
C11   0.0618(29)  0.0653(29)  0.0481(22)  0.0065(21) -0.0062(21) -0.0125(23)
C12   0.0595(30)  0.0863(38)  0.0704(30)  0.0134(28) -0.0020(25) -0.0184(27)
C13   0.0516(27)  0.1076(43)  0.0568(26)  0.0120(28)  0.0053(22) -0.0091(27)
C14   0.0491(24)  0.0847(36)  0.0462(22)  0.0139(23)  0.0082(19) -0.0017(24)
C15   0.0579(28)  0.0790(34)  0.0490(23)  0.0009(23)  0.0087(21) -0.0046(25)
C16   0.0584(26)  0.0619(27)  0.0409(20) -0.0013(18)  0.0078(19) -0.0008(21)
C17   0.0802(32)  0.0753(34)  0.0443(22) -0.0034(22)  0.0107(22) -0.0019(27)
C18   0.0749(33)  0.0877(39)  0.0416(21)  0.0055(23)  0.0027(22) -0.0060(28)
C19   0.0696(31)  0.0802(36)  0.0441(22)  0.0026(22) -0.0057(22)  0.0020(25)
C20   0.0596(25)  0.0727(29)  0.0401(19) -0.0031(22) -0.0033(18) -0.0064(25)
C21   0.0543(27)  0.1079(42)  0.0478(23) -0.0009(27) -0.0032(20)  0.0079(28)
C22   0.1127(50)  0.1523(64)  0.0564(31)  0.0107(37)  0.0297(33) -0.0378(48)
C23   0.101(5)    0.247(11)   0.073(4)   -0.017(5)    0.034(4)   -0.063(6)
C24   0.1196(50)  0.0703(38)  0.0732(35)  0.0121(29)  0.0032(33) -0.0136(36)
C25   0.1740(83)  0.0959(57)  0.1467(75)  0.0046(51) -0.0024(61) -0.0093(55)
C26   0.1101(47)  0.0846(39)  0.0741(33) -0.0159(32) -0.0075(31) -0.0300(37)
C27   0.0991(47)  0.1280(57)  0.0898(42) -0.0063(41) -0.0271(36) -0.0333(44)
C28   0.1018(44)  0.0648(36)  0.0911(39)  0.0000(30)  0.0007(33)  0.0166(32)
C29   0.1638(82)  0.1353(72)  0.1388(75)  0.0162(59)  0.0270(64)  0.0497(61)
C30   0.0719(34)  0.1075(45)  0.0596(28) -0.0035(28)  0.0176(25)  0.0093(31)
C31   0.0701(38)  0.1565(66)  0.1067(49)  0.0001(48)  0.0304(36)  0.0205(41)
C32   0.0695(31)  0.0680(32)  0.0560(25)  0.0043(23) -0.0024(23)  0.0088(25)
C33   0.1123(50)  0.0670(37)  0.1024(44) -0.0010(33) -0.0032(37) -0.0003(34)
C34   0.1160(50)  0.1042(48)  0.0610(31) -0.0031(32)  0.0100(32)  0.0326(40)
C35   0.1929(93)  0.1674(87)  0.1132(61) -0.0092(59)  0.0518(62)  0.0678(73)
C36   0.0622(33)  0.1998(82)  0.0548(28) -0.0045(42) -0.0055(25) -0.0107(43)
C37   0.118(6)    0.250(11)   0.071(4)   -0.021(6)   -0.001(4)   -0.084(7)
C41   0.1507(69)  0.1740(80)  0.0746(41)  0.0166(45)  0.0240(43)  0.0734(60)
C43   0.155(8)    0.231(11)   0.131(7)    0.062(7)    0.004(6)    0.068(8)

loop_
_geom_bond_atom_site_label_1
_geom_bond_atom_site_label_2
_geom_bond_distance
_geom_bond_publ_flag
 
                      CU1   N1      1.883(4)   yes
                      CU1   N2      1.951(4)   yes
                      CU1   N3      1.895(4)   yes
                      CU1   N4      2.119(4)   yes
                      LI1   O1      1.89(1)    yes
                      LI1   O2      2.00(1)    yes
                      LI1   C6      2.52(1)    yes
                      LI1   C7      2.25(1)    yes
                      LI1   C8      2.27(1)    yes
                      LI1   C9      2.52(1)    yes
                      O1    C41     1.415(9)   yes
                      O1    C44A    1.54(1)    yes
                      O1    C44B    1.46(1)    yes
                      O2    C45A    1.48(2)    yes
                      O2    C48A    1.46(1)    yes
                      O2    C45B    1.46(1)    yes
                      O2    C48B    1.49(2)    yes
                      N1    C1      1.374(5)   yes
                      N1    C4      1.372(6)   yes
                      N2    C6      1.373(6)   yes
                      N2    C9      1.373(6)   yes
                      N3    C11     1.394(6)   yes
                      N3    C14     1.359(6)   yes
                      N4    C16     1.352(6)   yes
                      N4    C20     1.349(6)   yes
                      C1    C2      1.373(9)   yes
                      C1    C21     1.520(7)   yes
                      C2    C3      1.404(8)   yes
                      C3    C4      1.384(8)   yes
                      C4    C5      1.524(6)   yes
                      C5    C6      1.520(8)   yes
                      C5    C22     1.537(9)   yes
                      C5    C24     1.545(9)   yes
                      C6    C7      1.400(6)   yes
                      C7    C8      1.384(8)   yes
                      C8    C9      1.381(6)   yes
                      C9    C10     1.522(8)   yes
                      C10   C11     1.516(8)   yes
                      C10   C26     1.555(8)   yes
                      C10   C28     1.550(8)   yes
                      C11   C12     1.355(7)   yes
                      C12   C13     1.422(8)   yes
                      C13   C14     1.374(7)   yes
                      C14   C15     1.520(7)   yes
                      C15   C16     1.556(6)   yes
                      C15   C30     1.566(8)   yes
                      C15   C32     1.542(7)   yes
                      C16   C17     1.380(5)   yes
                      C17   C18     1.375(6)   yes
                      C18   C19     1.344(7)   yes
                      C19   C20     1.403(6)   yes
                      C20   C21     1.512(7)   yes
                      C21   C34     1.545(9)   yes
                      C21   C36     1.575(7)   yes
                      C22   C23     1.47(1)    yes
                      C24   C25     1.51(1)    yes
                      C26   C27     1.519(9)   yes
                      C28   C29     1.48(1)    yes
                      C30   C31     1.547(8)   yes
                      C32   C33     1.509(8)   yes
                      C34   C35     1.53(1)    yes
                      C36   C37     1.51(1)    yes
                      C41   C42A    1.44(2)    yes
                      C41   C42B    1.51(2)    yes
                      C43   C42A    1.55(1)    yes
                      C43   C44A    1.59(2)    yes
                      C43   C42B    1.65(2)    yes
                      C43   C44B    1.47(2)    yes
                      C42A  C42B    0.88(2)    yes
                      C44A  C44B    0.89(2)    yes
                      C45A  C46A    1.53(3)    yes
                      C45A  C45B    0.73(2)    yes
                      C45A  C46B    1.74(2)    yes
                      C46A  C47A    1.54(3)    yes
                      C46A  C45B    1.69(3)    yes
                      C46A  C46B    0.92(3)    yes
                      C47A  C48A    1.54(2)    yes
                      C47A  C46B    1.27(2)    yes
                      C47A  C47B    1.12(3)    yes
                      C48A  C47B    1.51(2)    yes
                      C48A  C48B    0.97(2)    yes
                      C45B  C46B    1.54(2)    yes
                      C46B  C47B    1.54(2)    yes
                      C47B  C48B    1.52(2)    yes
 
loop_
_geom_angle_atom_site_label_1
_geom_angle_atom_site_label_2
_geom_angle_atom_site_label_3
_geom_angle
_geom_angle_publ_flag
 
                       N3    CU1   N4       89.8(2)  yes
                       N2    CU1   N4      177.0(2)  yes
                       N2    CU1   N3       88.8(2)  yes
                       N1    CU1   N4       90.4(2)  yes
                       N1    CU1   N3      178.1(2)  yes
                       N1    CU1   N2       91.1(2)  yes
                       C8    LI1   C9       33.0(2)  yes
                       C7    LI1   C9       55.8(3)  yes
                       C7    LI1   C8       35.6(3)  yes
                       C6    LI1   C9       52.7(3)  yes
                       C6    LI1   C8       55.5(3)  yes
                       C6    LI1   C7       33.6(2)  yes
                       O2    LI1   C9      134.6(6)  yes
                       O2    LI1   C8      104.1(5)  yes
                       O2    LI1   C7       99.8(5)  yes
                       O2    LI1   C6      127.6(6)  yes
                       O1    LI1   C9      115.0(5)  yes
                       O1    LI1   C8      146.2(6)  yes
                       O1    LI1   C7      156.0(7)  yes
                       O1    LI1   C6      122.4(6)  yes
                       O1    LI1   O2      100.6(6)  yes
                       LI1   O1    C44B    123.1(7)  yes
                       LI1   O1    C44A    127.2(8)  yes
                       LI1   O1    C41     127.1(6)  yes
                       C44A  O1    C44B     34.2(9)  yes
                       C41   O1    C44B    108.7(8)  yes
                       C41   O1    C44A    101.2(8)  yes
                       LI1   O2    C48B    111.7(9)  yes
                       LI1   O2    C45B    124.7(7)  yes
                       LI1   O2    C48A    122.2(7)  yes
                       LI1   O2    C45A    118(1)    yes
                       C45B  O2    C48B    119(1)    yes
                       C48A  O2    C48B     39(1)    yes
                       C48A  O2    C45B    111.2(9)  yes
                       C45A  O2    C48B    130(1)    yes
                       C45A  O2    C45B     29(1)    yes
                       C45A  O2    C48A    103(1)    yes
                       CU1   N1    C4      126.7(3)  yes
                       CU1   N1    C1      124.7(3)  yes
                       C1    N1    C4      108.1(4)  yes
                       CU1   N2    C9      124.4(3)  yes
                       CU1   N2    C6      125.0(3)  yes
                       C6    N2    C9      108.8(4)  yes
                       CU1   N3    C14     125.2(3)  yes
                       CU1   N3    C11     127.4(3)  yes
                       C11   N3    C14     107.3(4)  yes
                       CU1   N4    C20     119.6(3)  yes
                       CU1   N4    C16     118.4(3)  yes
                       C16   N4    C20     119.4(4)  yes
                       N1    C1    C21     118.8(4)  yes
                       N1    C1    C2      108.1(4)  yes
                       C2    C1    C21     131.7(5)  yes
                       C1    C2    C3      108.5(5)  yes
                       C2    C3    C4      106.1(5)  yes
                       N1    C4    C3      109.2(4)  yes
                       C3    C4    C5      129.3(5)  yes
                       N1    C4    C5      121.4(4)  yes
                       C4    C5    C24     109.9(4)  yes
                       C4    C5    C22     110.6(4)  yes
                       C4    C5    C6      110.8(4)  yes
                       C22   C5    C24     108.7(4)  yes
                       C6    C5    C24     106.4(5)  yes
                       C6    C5    C22     110.3(4)  yes
                       N2    C6    C5      120.2(3)  yes
                       LI1   C6    C5      118.9(4)  yes
                       LI1   C6    N2       80.0(4)  yes
                       C5    C6    C7      131.7(4)  yes
                       N2    C6    C7      107.8(4)  yes
                       LI1   C6    C7       62.9(4)  yes
                       LI1   C7    C6       83.6(4)  yes
                       C6    C7    C8      107.0(4)  yes
                       LI1   C7    C8       72.8(5)  yes
                       LI1   C8    C7       71.6(4)  yes
                       C7    C8    C9      108.6(5)  yes
                       LI1   C8    C9       83.5(4)  yes
                       N2    C9    C8      107.8(4)  yes
                       LI1   C9    C8       63.5(4)  yes
                       LI1   C9    N2       79.9(4)  yes
                       C8    C9    C10     130.5(4)  yes
                       N2    C9    C10     121.5(4)  yes
                       LI1   C9    C10     126.9(4)  yes
                       C9    C10   C28     110.6(5)  yes
                       C9    C10   C26     109.4(4)  yes
                       C9    C10   C11     111.9(4)  yes
                       C26   C10   C28     108.1(4)  yes
                       C11   C10   C28     106.5(4)  yes
                       C11   C10   C26     110.2(5)  yes
                       N3    C11   C10     119.2(4)  yes
                       C10   C11   C12     132.2(5)  yes
                       N3    C11   C12     108.5(4)  yes
                       C11   C12   C13     108.3(4)  yes
                       C12   C13   C14     105.6(5)  yes
                       N3    C14   C13     110.3(4)  yes
                       C13   C14   C15     131.9(4)  yes
                       N3    C14   C15     117.8(4)  yes
                       C14   C15   C32     111.3(3)  yes
                       C14   C15   C30     110.2(4)  yes
                       C14   C15   C16     106.6(4)  yes
                       C30   C15   C32     109.9(4)  yes
                       C16   C15   C32     108.9(4)  yes
                       C16   C15   C30     109.9(4)  yes
                       N4    C16   C15     116.6(3)  yes
                       C15   C16   C17     121.9(4)  yes
                       N4    C16   C17     121.4(4)  yes
                       C16   C17   C18     119.1(4)  yes
                       C17   C18   C19     119.6(4)  yes
                       C18   C19   C20     120.6(4)  yes
                       N4    C20   C19     119.6(4)  yes
                       C19   C20   C21     120.9(4)  yes
                       N4    C20   C21     119.4(3)  yes
                       C1    C21   C20     115.2(4)  yes
                       C20   C21   C36     110.4(4)  yes
                       C20   C21   C34     106.0(4)  yes
                       C1    C21   C36     108.5(4)  yes
                       C1    C21   C34     108.6(4)  yes
                       C34   C21   C36     107.8(5)  yes
                       C5    C22   C23     117.2(6)  yes
                       C5    C24   C25     116.9(6)  yes
                       C10   C26   C27     116.6(5)  yes
                       C10   C28   C29     116.1(6)  yes
                       C15   C30   C31     113.9(5)  yes
                       C15   C32   C33     114.9(4)  yes
                       C21   C34   C35     115.0(6)  yes
                       C21   C36   C37     114.3(6)  yes
                       O1    C41   C42B    104.7(9)  yes
                       O1    C41   C42A    111.5(8)  yes
                       C42A  C41   C42B     35(1)    yes
                       C42B  C43   C44B     98(1)    yes
                       C44A  C43   C44B     34(1)    yes
                       C44A  C43   C42B    106(1)    yes
                       C42A  C43   C44B    107(1)    yes
                       C42A  C43   C42B     31.6(9)  yes
                       C42A  C43   C44A     96(1)    yes
                       C41   C42A  C43     104(1)    yes
                       C43   C42A  C42B     80(2)    yes
                       C41   C42A  C42B     77(2)    yes
                       O1    C44A  C43      98(1)    yes
                       C43   C44A  C44B     66(2)    yes
                       O1    C44A  C44B     68(2)    yes
                       C43   C42B  C42A     68(2)    yes
                       C41   C42B  C42A     68(2)    yes
                       C41   C42B  C43      97(1)    yes
                       C43   C44B  C44A     81(2)    yes
                       O1    C44B  C44A     78(2)    yes
                       O1    C44B  C43     108(1)    yes
                       O2    C45A  C46B     91(1)    yes
                       O2    C45A  C45B     74(2)    yes
                       O2    C45A  C46A    116(2)    yes
                       C45B  C45A  C46B     63(2)    yes
                       C46A  C45A  C46B     32(1)    yes
                       C46A  C45A  C45B     89(3)    yes
                       C45A  C46A  C46B     86(2)    yes
                       C45A  C46A  C45B     26(1)    yes
                       C45A  C46A  C47A     94(2)    yes
                       C45B  C46A  C46B     65(2)    yes
                       C47A  C46A  C46B     56(2)    yes
                       C47A  C46A  C45B     92(2)    yes
                       C46A  C47A  C47B    116(2)    yes
                       C46A  C47A  C46B     37(1)    yes
                       C46A  C47A  C48A    115(2)    yes
                       C46B  C47A  C47B     80(2)    yes
                       C48A  C47A  C47B     67(2)    yes
                       C48A  C47A  C46B    108(2)    yes
                       O2    C48A  C47A    103(1)    yes
                       C47A  C48A  C48B    114(2)    yes
                       C47A  C48A  C47B     43(1)    yes
                       O2    C48A  C48B     72(2)    yes
                       O2    C48A  C47B     98(1)    yes
                       C47B  C48A  C48B     72(2)    yes
                       C45A  C45B  C46A     65(2)    yes
                       O2    C45B  C46A    109(1)    yes
                       O2    C45B  C45A     77(2)    yes
                       C46A  C45B  C46B     33(1)    yes
                       C45A  C45B  C46B     93(3)    yes
                       O2    C45B  C46B    100(1)    yes
                       C47A  C46B  C45B    111(2)    yes
                       C46A  C46B  C45B     82(2)    yes
                       C46A  C46B  C47A     87(2)    yes
                       C45A  C46B  C45B     25(1)    yes
                       C45A  C46B  C47A     95(2)    yes
                       C45A  C46B  C46A     62(2)    yes
                       C45B  C46B  C47B    104(1)    yes
                       C47A  C46B  C47B     46(1)    yes
                       C46A  C46B  C47B    132(2)    yes
                       C45A  C46B  C47B    107(1)    yes
                       C48A  C47B  C46B     97(1)    yes
                       C47A  C47B  C46B     54(1)    yes
                       C47A  C47B  C48A     70(2)    yes
                       C46B  C47B  C48B    113(2)    yes
                       C48A  C47B  C48B     37(1)    yes
                       C47A  C47B  C48B    106(2)    yes
                       C48A  C48B  C47B     71(2)    yes
                       O2    C48B  C47B     96(1)    yes
                       O2    C48B  C48A     69(2)    yes
 
_refine_diff_density_max          0.603
_refine_diff_density_min          -0.373
_refine_diff_density_rms          0.063


data_COMPLEX8

_chemical_name_common             ?
_chemical_formula_moiety          ?
_chemical_formula_structural      ?
_chemical_formula_analytical      ?
_chemical_formula_sum             'C61H69BN4Ni'
_chemical_formula_weight          927.76
_chemical_melting_point           ?
_chemical_compound_source         ?

loop_
 _atom_type_symbol
 _atom_type_description 
 _atom_type_scat_dispersion_real 
 _atom_type_scat_dispersion_imag 
 _atom_type_scat_source 
 'Ni'  'Ni'  -3.0029   0.5091 
 'International Tables Vol C Tables 4.2.6.8 and 6.1.1.4' 
 'N'  'N'   0.0311   0.0180 
 'International Tables Vol C Tables 4.2.6.8 and 6.1.1.4' 
 'B'  'B'   0.0090   0.0039 
 'International Tables Vol C Tables 4.2.6.8 and 6.1.1.4' 
 'C'  'C'   0.0181   0.0091 
 'International Tables Vol C Tables 4.2.6.8 and 6.1.1.4' 
 'H'  'H'   0.0000   0.0000 
 'International Tables Vol C Tables 4.2.6.8 and 6.1.1.4' 
 
_symmetry_cell_setting            triclinic
_symmetry_space_group_name_H-M    'P-1'

loop_
 _symmetry_equiv_pos_as_xyz
 'x, y, z' 
 '-x, -y, -z' 
 
_cell_length_a                    14.275(3)
_cell_length_b                    14.482(3)
_cell_length_c                    12.745(2)
_cell_angle_alpha                 100.19(2)
_cell_angle_beta                  101.47(2)
_cell_angle_gamma                 99.03(2)
_cell_volume                      2490.5(9)
_cell_formula_units_Z             2.00
_cell_measurement_temperature     25
_cell_measurement_reflns_used     143
_cell_measurement_theta_min       18.9
_cell_measurement_theta_max       41.2

_exptl_crystal_description        flattened_prism
_exptl_crystal_colour             red
_exptl_crystal_size_max           0.55
_exptl_crystal_size_mid           0.27
_exptl_crystal_size_min           0.15
_exptl_crystal_density_meas       not_measured
_exptl_crystal_density_diffrn     1.2372
_exptl_crystal_density_method     not_measured
_exptl_crystal_F_000              992.0
_exptl_absorpt_coefficient_mu     0.8544
_exptl_absorpt_correction_type    'North et al. 1968'
_exptl_absorpt_correction_T_min   0.762
_exptl_absorpt_correction_T_max   1.000

_exptl_special_details
;
 ?
;

_diffrn_ambient_temperature       143
_diffrn_radiation_wavelength      1.54178
_diffrn_radiation_type            CuKa
_diffrn_radiation_source          'fine-focussealedtube'
_diffrn_radiation_monochromator   graphite
_diffrn_measurement_device        'Rigaku AFC6S'
_diffrn_measurement_method        'omega/2theta'
_diffrn_standards_number          3
_diffrn_standards_interval_count  150
_diffrn_standards_interval_time   ?
_diffrn_standards_decay_%         0.8
_diffrn_reflns_number             7911
_diffrn_reflns_av_R_equivalents   0.0984
_diffrn_reflns_av_sigmaI/netI     0.2589
_diffrn_reflns_limit_h_min        -9
_diffrn_reflns_limit_h_max        16
_diffrn_reflns_limit_k_min        -17
_diffrn_reflns_limit_k_max        17
_diffrn_reflns_limit_l_min        -15
_diffrn_reflns_limit_l_max        15
_diffrn_reflns_theta_min          3.16
_diffrn_reflns_theta_max          69.69
_reflns_number_total              7508
_reflns_number_observed           2788
_reflns_observed_criterion        >2sigma(I)

_computing_data_collection        'TEXSAN Software'
_computing_cell_refinement        'TEXSAN Software'
_computing_data_reduction         'TEXSAN Software'
_computing_structure_solution     'SHELXS-76 (Sheldrick, 1976)'
_computing_structure_refinement   'SHELXS-93 (Sheldrick, 1993)'
_computing_molecular_graphics     ?
_computing_publication_material   ?

_refine_special_details
;
 Refinement on F^2^ for ALL reflections except for 1736 with very negative F^2^ 
 or flagged by the user for potential systematic errors.  Weighted R-factors 
 wR and all goodnesses of fit S are based on F^2^, conventional R-factors R 
 are based on F, with F set to zero for negative F^2^. The observed criterion 
 of F^2^ > 2sigma(F^2^) is used only for calculating  R factor obs etc. and is 
 not relevant to the choice of reflections for refinement.  R-factors based 
 on F^2^ are statistically about twice as large as those based on F, and R- 
 factors based on ALL data will be even larger. 
; 

_refine_ls_structure_factor_coef  Fsqd
_refine_ls_matrix_type            full
_refine_ls_weighting_scheme 
 'calc w=1/[s^2^(Fo^2^)+( 0.0916P)^2^+1.0163P] where P=(Fo^2^+2Fc^2^)/3' 
_atom_sites_solution_primary      direct
_atom_sites_solution_secondary    difmap
_atom_sites_solution_hydrogens    difmap
_refine_ls_hydrogen_treatment     not_refined
_refine_ls_extinction_method      none
_refine_ls_extinction_coef        ?
_refine_ls_number_reflns          5772
_refine_ls_number_parameters      599
_refine_ls_number_restraints      0
_refine_ls_R_factor_all           0.2727
_refine_ls_R_factor_obs           0.0721
_refine_ls_wR_factor_all          0.2973
_refine_ls_wR_factor_obs          0.1748
_refine_ls_goodness_of_fit_all    1.105
_refine_ls_goodness_of_fit_obs    1.335
_refine_ls_restrained_S_all       1.310
_refine_ls_restrained_S_obs       1.335
_refine_ls_shift/esd_max          0.000
_refine_ls_shift/esd_mean         0.000

loop_
    _atom_site_label
    _atom_site_fract_x
    _atom_site_fract_y
    _atom_site_fract_z
    _atom_site_U_iso_or_equiv
    _atom_site_thermal_displace_type
    _atom_site_type_symbol
    _atom_site_calc_flag
    _atom_site_calc_attached_atom
    _atom_site_aniso_ratio
#
#  R=Rmax./Rmin.=ratio of the maximum and minimum
#                principal axes of atomic displacement ellipsoids
#
#                     Table of coordinates
#                     --------------------
#
#label    x/a         y/b         z/c        Ueq       tmf  typ .    att   R
 
 NI1    0.2350(1)  -0.2129(1)   0.2071(1)  0.0224(5)  aniso Ni  .   .     2.21
 N1     0.1731(5)  -0.2198(5)   0.3216(5)  0.0220(26) aniso N   .   .     2.09
 N2     0.2904(5)  -0.3114(5)   0.2556(5)  0.0203(23) aniso N   .   .     6.13
 N3     0.2957(5)  -0.2242(5)   0.0938(5)  0.0241(27) aniso N   .   .     6.49
 N4     0.1676(5)  -0.1153(4)   0.1629(5)  0.0185(24) aniso N   .   .    20.80
 C1     0.0802(6)  -0.2255(6)   0.3112(6)  0.0226(34) aniso C   .   .     2.38
 C2     0.0438(6)  -0.2799(6)   0.3867(7)  0.0300(35) aniso C   .   .     3.74
 C3     0.1205(7)  -0.3086(7)   0.4409(6)  0.0324(34) aniso C   .   .     3.64
 C4     0.2056(6)  -0.2727(6)   0.4037(6)  0.0241(24) aniso C   .   .    10.81
 C5     0.3145(6)  -0.2530(6)   0.4617(6)  0.0242(34) aniso C   .   .     2.28
 C6     0.2771(6)  -0.3321(6)   0.3575(6)  0.0249(31) aniso C   .   .    11.63
 C7     0.2817(5)  -0.4336(6)   0.3510(6)  0.0225(33) aniso C   .   .     5.45
 C8     0.2998(7)  -0.4658(6)   0.2548(7)  0.0322(38) aniso C   .   .     2.27
 C9     0.3046(5)  -0.3892(6)   0.1967(7)  0.0230(31) aniso C   .   .     6.47
 C10    0.3198(6)  -0.3972(6)   0.0820(7)  0.0225(32) aniso C   .   .     3.31
 C11    0.3310(6)  -0.3022(6)   0.0459(6)  0.0229(32) aniso C   .   .     5.24
 C12    0.3739(6)  -0.2752(6)  -0.0334(6)  0.0256(33) aniso C   .   .     3.91
 C13    0.3706(6)  -0.1792(6)  -0.0322(7)  0.0287(34) aniso C   .   .     3.41
 C14    0.3232(6)  -0.1502(6)   0.0462(6)  0.0214(29) aniso C   .   .     2.37
 C15    0.3138(6)  -0.0498(6)   0.0981(6)  0.0264(31) aniso C   .   .     2.49
 C16    0.2111(5)  -0.0458(6)   0.1191(6)  0.0167(29) aniso C   .   .     5.03
 C17    0.1711(7)   0.0328(6)   0.1032(6)  0.0284(34) aniso C   .   .     4.22
 C18    0.0828(7)   0.0413(6)   0.1265(7)  0.0301(34) aniso C   .   .     6.35
 C19    0.0350(6)  -0.0302(6)   0.1649(6)  0.0226(30) aniso C   .   .     5.92
 C20    0.0759(6)  -0.1070(6)   0.1856(6)  0.0247(32) aniso C   .   .     7.03
 C21    0.0211(5)  -0.1895(6)   0.2243(6)  0.0191(31) aniso C   .   .     3.50
 C22    0.3829(6)  -0.1640(6)   0.4594(7)  0.0270(33) aniso C   .   .     3.23
 C23    0.4870(7)  -0.1816(8)   0.4688(8)  0.0463(40) aniso C   .   .     3.16
 C24    0.3314(7)  -0.2889(6)   0.5675(7)  0.0314(31) aniso C   .   .    17.96
 C25    0.3200(7)  -0.2167(7)   0.6649(7)  0.0413(41) aniso C   .   .     3.81
 C26    0.4191(7)  -0.4345(7)   0.0813(7)  0.0371(36) aniso C   .   .     1.38
 C27    0.5064(7)  -0.3708(8)   0.1614(8)  0.0476(44) aniso C   .   .     3.28
 C28    0.2371(7)  -0.4744(6)   0.0039(7)  0.0335(33) aniso C   .   .     2.38
 C29    0.1362(7)  -0.4496(7)  -0.0022(8)  0.0402(40) aniso C   .   .     2.30
 C30    0.3846(6)  -0.0152(6)   0.2142(6)  0.0242(28) aniso C   .   .     3.48
 C31    0.4891(7)  -0.0315(7)   0.2194(7)  0.0402(38) aniso C   .   .     2.81
 C32    0.3444(6)   0.0207(7)   0.0268(7)  0.0340(36) aniso C   .   .     6.29
 C33    0.2782(7)   0.0052(7)  -0.0900(7)  0.0417(37) aniso C   .   .     4.42
 C34   -0.0642(7)  -0.1559(7)   0.2733(7)  0.0332(35) aniso C   .   .     1.86
 C35   -0.0299(7)  -0.0787(7)   0.3777(7)  0.0342(37) aniso C   .   .     1.95
 C36   -0.0249(7)  -0.2762(7)   0.1260(7)  0.0335(35) aniso C   .   .     2.36
 C37   -0.0994(7)  -0.2594(7)   0.0321(7)  0.0399(34) aniso C   .   .     2.69
 B1     0.2142(7)  -0.6982(8)   0.4374(8)  0.0243(36) aniso B   .   .     1.98
 C41    0.2389(6)  -0.7894(6)   0.4942(6)  0.0219(31) aniso C   .   .     1.68
 C42    0.2668(6)  -0.7849(7)   0.6082(7)  0.0302(32) aniso C   .   .     5.07
 C43    0.2875(7)  -0.8633(7)   0.6501(7)  0.0352(35) aniso C   .   .     2.71
 C44    0.2773(7)  -0.9513(7)   0.5821(8)  0.0356(38) aniso C   .   .     2.17
 C45    0.2506(6)  -0.9589(6)   0.4699(7)  0.0297(36) aniso C   .   .     2.49
 C46    0.2327(6)  -0.8810(7)   0.4271(7)  0.0328(36) aniso C   .   .     3.90
 C47    0.2973(6)  -0.6794(6)   0.3660(6)  0.0245(32) aniso C   .   .     2.42
 C48    0.3911(7)  -0.6209(7)   0.4091(7)  0.0342(37) aniso C   .   .     2.88
 C49    0.4588(7)  -0.6077(6)   0.3472(7)  0.0315(38) aniso C   .   .     3.93
 C50    0.4388(7)  -0.6560(6)   0.2392(8)  0.0354(38) aniso C   .   .     3.59
 C51    0.3475(8)  -0.7144(7)   0.1933(7)  0.0411(42) aniso C   .   .     5.28
 C52    0.2800(7)  -0.7238(7)   0.2534(7)  0.0357(36) aniso C   .   .     2.45
 C53    0.2140(6)  -0.6042(7)   0.5335(6)  0.0289(32) aniso C   .   .     6.90
 C54    0.2944(7)  -0.5631(6)   0.6237(7)  0.0286(34) aniso C   .   .     4.50
 C55    0.2930(7)  -0.4882(6)   0.7064(6)  0.0307(33) aniso C   .   .     5.36
 C56    0.2080(8)  -0.4512(6)   0.7060(8)  0.0392(43) aniso C   .   .     6.03
 C57    0.1277(7)  -0.4901(7)   0.6199(7)  0.0318(38) aniso C   .   .     2.32
 C58    0.1310(6)  -0.5638(7)   0.5358(7)  0.0276(33) aniso C   .   .     3.75
 C59    0.1061(6)  -0.7288(6)   0.3550(6)  0.0246(31) aniso C   .   .     2.01
 C60    0.0342(6)  -0.8038(7)   0.3591(7)  0.0313(35) aniso C   .   .     2.89
 C61   -0.0596(6)  -0.8252(6)   0.2905(7)  0.0309(35) aniso C   .   .     2.10
 C62   -0.0855(6)  -0.7726(7)   0.2126(8)  0.0371(38) aniso C   .   .     4.38
 C63   -0.0153(7)  -0.6975(7)   0.2067(7)  0.0391(37) aniso C   .   .     2.54
 C64    0.0779(6)  -0.6741(6)   0.2761(6)  0.0293(34) aniso C   .   .     2.55
 H2    -0.02530(0) -0.29450(0)  0.40830(0) 0.0500(0)  iso   H   .   C2    1.00
 H3     0.11790(0) -0.34510(0)  0.51020(0) 0.0500(0)  iso   H   .   C3    1.00
 H7     0.27330(0) -0.46230(0)  0.41640(0) 0.0500(0)  iso   H   .   C7    1.00
 H8     0.31860(0) -0.51730(0)  0.24050(0) 0.0500(0)  iso   H   .   C8    1.00
 H12    0.41460(0) -0.30160(0) -0.06950(0) 0.0500(0)  iso   H   .   C12   1.00
 H13    0.40790(0) -0.14550(0) -0.07550(0) 0.0500(0)  iso   H   .   C13   1.00
 H17    0.19860(0)  0.07520(0)  0.07040(0) 0.0500(0)  iso   H   .   C17   1.00
 H18    0.06560(0)  0.10310(0)  0.11650(0) 0.0500(0)  iso   H   .   C18   1.00
 H19   -0.02400(0) -0.01960(0)  0.17450(0) 0.0500(0)  iso   H   .   C19   1.00
 H221   0.39810(0) -0.10880(0)  0.51660(0) 0.0500(0)  iso   H   .   C22   1.00
 H222   0.35510(0) -0.13480(0)  0.40390(0) 0.0500(0)  iso   H   .   C22   1.00
 H231   0.53400(0) -0.13370(0)  0.45260(0) 0.0500(0)  iso   H   .   C23   1.00
 H232   0.49300(0) -0.22520(0)  0.40970(0) 0.0500(0)  iso   H   .   C23   1.00
 H233   0.51270(0) -0.20180(0)  0.53830(0) 0.0500(0)  iso   H   .   C23   1.00
 H241   0.29040(0) -0.34590(0)  0.56910(0) 0.0500(0)  iso   H   .   C24   1.00
 H242   0.40230(0) -0.31050(0)  0.59340(0) 0.0500(0)  iso   H   .   C24   1.00
 H251   0.32100(0) -0.24170(0)  0.74360(0) 0.0500(0)  iso   H   .   C25   1.00
 H252   0.25970(0) -0.20300(0)  0.65600(0) 0.0500(0)  iso   H   .   C25   1.00
 H253   0.36970(0) -0.14570(0)  0.68530(0) 0.0500(0)  iso   H   .   C25   1.00
 H261   0.40700(0) -0.49950(0)  0.09340(0) 0.0500(0)  iso   H   .   C26   1.00
 H262   0.42540(0) -0.44250(0)  0.01350(0) 0.0500(0)  iso   H   .   C26   1.00
 H271   0.56960(0) -0.39840(0)  0.15030(0) 0.0500(0)  iso   H   .   C27   1.00
 H272   0.51110(0) -0.36480(0)  0.22710(0) 0.0500(0)  iso   H   .   C27   1.00
 H273   0.52640(0) -0.28830(0)  0.16310(0) 0.0500(0)  iso   H   .   C27   1.00
 H281   0.24610(0) -0.48440(0) -0.07850(0) 0.0500(0)  iso   H   .   C28   1.00
 H282   0.23660(0) -0.53210(0)  0.00620(0) 0.0500(0)  iso   H   .   C28   1.00
 H291   0.08040(0) -0.50130(0) -0.05680(0) 0.0500(0)  iso   H   .   C29   1.00
 H292   0.15130(0) -0.38510(0) -0.02210(0) 0.0500(0)  iso   H   .   C29   1.00
 H293   0.12240(0) -0.44940(0)  0.06930(0) 0.0500(0)  iso   H   .   C29   1.00
 H301   0.35360(0) -0.05410(0)  0.26690(0) 0.0500(0)  iso   H   .   C30   1.00
 H302   0.40540(0)  0.05550(0)  0.24880(0) 0.0500(0)  iso   H   .   C30   1.00
 H311   0.52170(0) -0.00890(0)  0.28050(0) 0.0500(0)  iso   H   .   C31   1.00
 H312   0.51920(0) -0.00120(0)  0.16640(0) 0.0500(0)  iso   H   .   C31   1.00
 H313   0.47890(0) -0.09030(0)  0.18800(0) 0.0500(0)  iso   H   .   C31   1.00
 H321   0.41000(0)  0.02590(0)  0.02180(0) 0.0500(0)  iso   H   .   C32   1.00
 H322   0.35800(0)  0.08380(0)  0.08680(0) 0.0500(0)  iso   H   .   C32   1.00
 H331   0.32270(0)  0.03560(0) -0.12720(0) 0.0500(0)  iso   H   .   C33   1.00
 H332   0.21130(0)  0.00260(0) -0.08200(0) 0.0500(0)  iso   H   .   C33   1.00
 H333   0.27550(0) -0.05080(0) -0.13260(0) 0.0500(0)  iso   H   .   C33   1.00
 H341  -0.10490(0) -0.14690(0)  0.21570(0) 0.0500(0)  iso   H   .   C34   1.00
 H342  -0.09430(0) -0.20590(0)  0.28710(0) 0.0500(0)  iso   H   .   C34   1.00
 H351  -0.08340(0) -0.07440(0)  0.40770(0) 0.0500(0)  iso   H   .   C35   1.00
 H352   0.01040(0) -0.01320(0)  0.37440(0) 0.0500(0)  iso   H   .   C35   1.00
 H353   0.01390(0) -0.10380(0)  0.43180(0) 0.0500(0)  iso   H   .   C35   1.00
 H361   0.02390(0) -0.30000(0)  0.09800(0) 0.0500(0)  iso   H   .   C36   1.00
 H362  -0.05570(0) -0.32630(0)  0.15700(0) 0.0500(0)  iso   H   .   C36   1.00
 H371  -0.11340(0) -0.30770(0) -0.03220(0) 0.0500(0)  iso   H   .   C37   1.00
 H372  -0.07620(0) -0.21030(0)  0.01320(0) 0.0500(0)  iso   H   .   C37   1.00
 H373  -0.16030(0) -0.24530(0)  0.06530(0) 0.0500(0)  iso   H   .   C37   1.00
 H42    0.28210(0) -0.72940(0)  0.66390(0) 0.0500(0)  iso   H   .   C42   1.00
 H43    0.28720(0) -0.86970(0)  0.72560(0) 0.0500(0)  iso   H   .   C43   1.00
 H44    0.27840(0) -1.01910(0)  0.60670(0) 0.0500(0)  iso   H   .   C44   1.00
 H45    0.24620(0) -1.02970(0)  0.41020(0) 0.0500(0)  iso   H   .   C45   1.00
 H46    0.21690(0) -0.88620(0)  0.35730(0) 0.0500(0)  iso   H   .   C46   1.00
 H48    0.40190(0) -0.57910(0)  0.47410(0) 0.0500(0)  iso   H   .   C48   1.00
 H49    0.52320(0) -0.56650(0)  0.38730(0) 0.0500(0)  iso   H   .   C49   1.00
 H50    0.49590(0) -0.64570(0)  0.20120(0) 0.0500(0)  iso   H   .   C50   1.00
 H51    0.34070(0) -0.74390(0)  0.13360(0) 0.0500(0)  iso   H   .   C51   1.00
 H52    0.22570(0) -0.75790(0)  0.23000(0) 0.0500(0)  iso   H   .   C52   1.00
 H54    0.34960(0) -0.59740(0)  0.62310(0) 0.0500(0)  iso   H   .   C54   1.00
 H55    0.35640(0) -0.46000(0)  0.75820(0) 0.0500(0)  iso   H   .   C55   1.00
 H56    0.21590(0) -0.39460(0)  0.76010(0) 0.0500(0)  iso   H   .   C56   1.00
 H57    0.07340(0) -0.46750(0)  0.63280(0) 0.0500(0)  iso   H   .   C57   1.00
 H58    0.07120(0) -0.59680(0)  0.48470(0) 0.0500(0)  iso   H   .   C58   1.00
 H60    0.03490(0) -0.84880(0)  0.41220(0) 0.0500(0)  iso   H   .   C60   1.00
 H61   -0.11290(0) -0.86700(0)  0.28620(0) 0.0500(0)  iso   H   .   C61   1.00
 H62   -0.15510(0) -0.80020(0)  0.16800(0) 0.0500(0)  iso   H   .   C62   1.00
 H63   -0.02180(0) -0.66430(0)  0.15640(0) 0.0500(0)  iso   H   .   C63   1.00
 H64    0.11820(0) -0.61130(0)  0.24680(0) 0.0500(0)  iso   H   .   C64   1.00

loop_
    _atom_site_aniso_label
    _atom_site_aniso_U_11
    _atom_site_aniso_U_22
    _atom_site_aniso_U_33
    _atom_site_aniso_U_23
    _atom_site_aniso_U_13
    _atom_site_aniso_U_12

#label   U11         U22         U33         U23         U13         U12

NI1   0.0244(8)   0.0268(9)   0.0161(7)   0.0075(7)   0.0051(6)   0.0014(7)
N1    0.0246(42)  0.0203(41)  0.0202(37)  0.0077(32)  0.0045(32) -0.0007(34)
N2    0.0289(41)  0.0160(40)  0.0129(34)  0.0078(30) -0.0049(30)  0.0030(34)
N3    0.0354(44)  0.0261(44)  0.0107(33)  0.0063(32)  0.0095(32) -0.0025(37)
N4    0.0323(42)  0.0024(34)  0.0137(33)  0.0019(28) -0.0060(30) -0.0027(31)
C1    0.0304(53)  0.0155(47)  0.0201(44)  0.0027(38)  0.0069(39) -0.0012(41)
C2    0.0327(55)  0.0371(59)  0.0234(47)  0.0134(44)  0.0134(43) -0.0003(47)
C3    0.0427(61)  0.0376(60)  0.0144(44)  0.0038(42)  0.0077(43)  0.0010(50)
C4    0.0345(47)  0.0260(49)  0.0206(0)   0.0203(35)  0.0103(0)   0.0101(0)
C5    0.0243(48)  0.0283(53)  0.0218(44)  0.0129(40)  0.0033(37)  0.0049(42)
C6    0.0163(46)  0.0395(60)  0.0187(43)  0.0023(41)  0.0139(37) -0.0031(42)
C7    0.0117(44)  0.0330(56)  0.0247(46)  0.0142(42)  0.0067(36) -0.0019(40)
C8    0.0369(57)  0.0289(55)  0.0386(55)  0.0162(46)  0.0134(45)  0.0138(47)
C9    0.0116(43)  0.0252(52)  0.0245(45)  0.0059(41) -0.0082(36) -0.0041(39)
C10   0.0220(47)  0.0216(50)  0.0276(46)  0.0018(39)  0.0135(38)  0.0096(40)
C11   0.0199(46)  0.0338(55)  0.0095(39) -0.0040(38)  0.0041(35) -0.0019(43)
C12   0.0186(46)  0.0376(59)  0.0155(42) -0.0054(40)  0.0059(36)  0.0006(43)
C13   0.0369(55)  0.0235(54)  0.0239(46)  0.0089(41)  0.0088(42) -0.0054(44)
C14   0.0210(46)  0.0270(51)  0.0134(40)  0.0040(38)  0.0024(36) -0.0004(40)
C15   0.0368(55)  0.0219(50)  0.0170(43)  0.0035(38)  0.0043(40) -0.0016(43)
C16   0.0142(42)  0.0239(50)  0.0133(40)  0.0048(37)  0.0089(34) -0.0003(40)
C17   0.0361(56)  0.0276(56)  0.0151(44) -0.0058(40)  0.0073(40) -0.0019(47)
C18   0.0430(59)  0.0184(50)  0.0230(47)  0.0114(41) -0.0090(44)  0.0021(47)
C19   0.0312(51)  0.0221(50)  0.0247(46)  0.0158(40)  0.0109(39)  0.0177(43)
C20   0.0238(49)  0.0392(58)  0.0074(39)  0.0033(39)  0.0043(36) -0.0039(45)
C21   0.0114(42)  0.0275(51)  0.0238(43)  0.0131(38)  0.0079(35)  0.0065(38)
C22   0.0246(49)  0.0228(51)  0.0318(49)  0.0151(41) -0.0026(40)  0.0004(41)
C23   0.0214(52)  0.0575(73)  0.0590(68)  0.0189(57)  0.0047(48)  0.0038(52)
C24   0.0505(54)  0.0347(57)  0.0211(0)   0.0246(38)  0.0126(0)   0.0177(45)
C25   0.0570(66)  0.0531(69)  0.0197(47)  0.0122(47)  0.0154(46)  0.0150(57)
C26   0.0413(60)  0.0375(61)  0.0350(53)  0.0125(47)  0.0093(46)  0.0091(49)
C27   0.0345(59)  0.0525(71)  0.0398(60) -0.0037(53) -0.0097(48)  0.0000(52)
C28   0.0452(61)  0.0262(55)  0.0249(48)  0.0003(41)  0.0095(44) -0.0008(47)
C29   0.0346(58)  0.0372(61)  0.0395(57)  0.0037(48)  0.0023(47) -0.0070(49)
C30   0.0214(47)  0.0283(51)  0.0193(43)  0.0056(38)  0.0058(36) -0.0076(40)
C31   0.0426(60)  0.0453(66)  0.0244(49) -0.0015(46)  0.0080(45) -0.0055(51)
C32   0.0277(52)  0.0511(65)  0.0194(44) -0.0017(44)  0.0149(40) -0.0049(47)
C33   0.0455(62)  0.0401(63)  0.0349(54)  0.0128(49)  0.0127(48) -0.0142(52)
C34   0.0345(55)  0.0330(57)  0.0366(53)  0.0138(46)  0.0148(45)  0.0049(46)
C35   0.0345(55)  0.0352(59)  0.0364(53)  0.0092(47)  0.0174(45)  0.0043(47)
C36   0.0427(59)  0.0355(58)  0.0221(47)  0.0088(43)  0.0086(43)  0.0025(48)
C37   0.0419(61)  0.0355(60)  0.0314(53)  0.0051(46) -0.0032(46) -0.0071(49)
B1    0.0183(53)  0.0331(64)  0.0203(51)  0.0062(46)  0.0044(43)  0.0011(48)
C41   0.0253(49)  0.0193(48)  0.0220(44)  0.0077(38)  0.0057(37)  0.0027(40)
C42   0.0257(50)  0.0426(62)  0.0194(44)  0.0181(43) -0.0027(38) -0.0039(45)
C43   0.0329(56)  0.0496(67)  0.0299(51)  0.0174(50)  0.0146(44)  0.0083(51)
C44   0.0360(57)  0.0398(62)  0.0350(54)  0.0186(49)  0.0104(46)  0.0043(49)
C45   0.0192(48)  0.0303(55)  0.0432(58)  0.0136(47)  0.0101(43)  0.0058(43)
C46   0.0252(51)  0.0319(59)  0.0310(51) -0.0023(45)  0.0048(41) -0.0116(45)
C47   0.0285(51)  0.0234(50)  0.0198(44)  0.0084(39) -0.0011(39)  0.0041(42)
C48   0.0442(60)  0.0345(59)  0.0196(47)  0.0054(43)  0.0071(44) -0.0036(49)
C49   0.0404(58)  0.0211(53)  0.0369(55)  0.0157(45)  0.0050(46)  0.0128(46)
C50   0.0450(62)  0.0236(54)  0.0465(60)  0.0058(47)  0.0279(50)  0.0129(49)
C51   0.0607(70)  0.0283(58)  0.0231(49) -0.0094(43)  0.0076(49) -0.0043(53)
C52   0.0348(56)  0.0421(63)  0.0331(53)  0.0061(47)  0.0185(45)  0.0041(49)
C53   0.0274(52)  0.0404(59)  0.0179(44)  0.0123(41)  0.0093(39) -0.0078(46)
C54   0.0419(57)  0.0178(50)  0.0284(49)  0.0139(42)  0.0086(44)  0.0021(45)
C55   0.0469(61)  0.0271(55)  0.0167(44)  0.0098(41)  0.0090(43) -0.0048(49)
C56   0.0634(74)  0.0161(52)  0.0457(60)  0.0104(46)  0.0317(57)  0.0021(52)
C57   0.0394(57)  0.0326(56)  0.0294(50)  0.0091(45)  0.0188(45)  0.0086(48)
C58   0.0138(46)  0.0446(61)  0.0258(48)  0.0109(44)  0.0072(38)  0.0029(44)
C59   0.0215(47)  0.0316(55)  0.0203(44)  0.0099(40)  0.0026(37)  0.0020(42)
C60   0.0269(52)  0.0410(61)  0.0232(47) -0.0001(43)  0.0115(40) -0.0008(47)
C61   0.0261(52)  0.0280(54)  0.0329(51) -0.0041(44)  0.0051(42)  0.0031(44)
C62   0.0220(52)  0.0327(59)  0.0422(58) -0.0061(48) -0.0051(44) -0.0051(47)
C63   0.0358(57)  0.0540(69)  0.0249(49)  0.0119(48)  0.0019(44)  0.0037(53)
C64   0.0405(57)  0.0297(55)  0.0165(43)  0.0051(41)  0.0047(42)  0.0060(46)

loop_
_geom_bond_atom_site_label_1
_geom_bond_atom_site_label_2
_geom_bond_distance
_geom_bond_publ_flag
 
                      NI1   N1      1.860(7)   yes
                      NI1   N2      1.875(8)   yes
                      NI1   N3      1.822(7)   yes
                      NI1   N4      1.933(7)   yes
                      N1    C1      1.29(1)    yes
                      N1    C4      1.45(1)    yes
                      N2    C6      1.42(1)    yes
                      N2    C9      1.31(1)    yes
                      N3    C11     1.40(1)    yes
                      N3    C14     1.37(1)    yes
                      N4    C16     1.36(1)    yes
                      N4    C20     1.41(1)    yes
                      C1    C2      1.47(1)    yes
                      C1    C21     1.48(1)    yes
                      C2    C3      1.34(1)    yes
                      C3    C4      1.45(1)    yes
                      C4    C5      1.54(1)    yes
                      C4    C6      1.57(1)    yes
                      C5    C6      1.53(1)    yes
                      C5    C22     1.50(1)    yes
                      C5    C24     1.52(1)    yes
                      C6    C7      1.47(1)    yes
                      C7    C8      1.32(1)    yes
                      C8    C9      1.44(1)    yes
                      C9    C10     1.51(1)    yes
                      C10   C11     1.52(1)    yes
                      C10   C26     1.60(1)    yes
                      C10   C28     1.54(1)    yes
                      C11   C12     1.36(1)    yes
                      C12   C13     1.40(1)    yes
                      C13   C14     1.36(1)    yes
                      C14   C15     1.53(1)    yes
                      C15   C16     1.55(1)    yes
                      C15   C30     1.56(1)    yes
                      C15   C32     1.55(1)    yes
                      C16   C17     1.38(1)    yes
                      C17   C18     1.37(1)    yes
                      C18   C19     1.37(1)    yes
                      C19   C20     1.38(1)    yes
                      C20   C21     1.53(1)    yes
                      C21   C34     1.58(1)    yes
                      C21   C36     1.56(1)    yes
                      C22   C23     1.53(1)    yes
                      C24   C25     1.53(1)    yes
                      C26   C27     1.50(1)    yes
                      C28   C29     1.53(1)    yes
                      C30   C31     1.54(1)    yes
                      C32   C33     1.55(1)    yes
                      C34   C35     1.52(1)    yes
                      C36   C37     1.52(1)    yes
                      B1    C41     1.67(1)    yes
                      B1    C47     1.65(1)    yes
                      B1    C53     1.66(1)    yes
                      B1    C59     1.63(1)    yes
                      C41   C42     1.41(1)    yes
                      C41   C46     1.42(1)    yes
                      C42   C43     1.39(1)    yes
                      C43   C44     1.38(1)    yes
                      C44   C45     1.38(1)    yes
                      C45   C46     1.37(1)    yes
                      C47   C48     1.41(1)    yes
                      C47   C52     1.42(1)    yes
                      C48   C49     1.38(1)    yes
                      C49   C50     1.38(1)    yes
                      C50   C51     1.39(1)    yes
                      C51   C52     1.35(1)    yes
                      C53   C54     1.42(1)    yes
                      C53   C58     1.40(1)    yes
                      C54   C55     1.38(1)    yes
                      C55   C56     1.40(1)    yes
                      C56   C57     1.38(1)    yes
                      C57   C58     1.39(1)    yes
                      C59   C60     1.39(1)    yes
                      C59   C64     1.42(1)    yes
                      C60   C61     1.40(1)    yes
                      C61   C62     1.38(1)    yes
                      C62   C63     1.38(1)    yes
                      C63   C64     1.40(1)    yes
 
loop_
_geom_angle_atom_site_label_1
_geom_angle_atom_site_label_2
_geom_angle_atom_site_label_3
_geom_angle
_geom_angle_publ_flag
 
                       N3    NI1   N4       94.9(3)  yes
                       N2    NI1   N4      174.5(3)  yes
                       N2    NI1   N3       89.8(3)  yes
                       N1    NI1   N4       92.0(3)  yes
                       N1    NI1   N3      171.8(3)  yes
                       N1    NI1   N2       83.1(3)  yes
                       NI1   N1    C4      120.3(6)  yes
                       NI1   N1    C1      123.7(5)  yes
                       C1    N1    C4      107.3(7)  yes
                       NI1   N2    C9      128.2(6)  yes
                       NI1   N2    C6      118.0(6)  yes
                       C6    N2    C9      107.6(7)  yes
                       NI1   N3    C14     123.7(6)  yes
                       NI1   N3    C11     129.2(6)  yes
                       C11   N3    C14     106.9(7)  yes
                       NI1   N4    C20     121.4(5)  yes
                       NI1   N4    C16     121.1(6)  yes
                       C16   N4    C20     117.2(6)  yes
                       N1    C1    C21     121.6(8)  yes
                       N1    C1    C2      111.3(8)  yes
                       C2    C1    C21     126.7(8)  yes
                       C1    C2    C3      106.4(8)  yes
                       C2    C3    C4      108.5(8)  yes
                       N1    C4    C3      106.4(7)  yes
                       C3    C4    C6      127.3(8)  yes
                       C3    C4    C5      129.9(7)  yes
                       N1    C4    C6      105.9(6)  yes
                       N1    C4    C5      119.5(7)  yes
                       C5    C4    C6       59.0(5)  yes
                       C4    C5    C24     112.3(7)  yes
                       C4    C5    C22     121.4(7)  yes
                       C4    C5    C6       61.4(5)  yes
                       C22   C5    C24     116.5(7)  yes
                       C6    C5    C24     114.5(7)  yes
                       C6    C5    C22     119.3(7)  yes
                       C4    C6    C5       59.5(5)  yes
                       N2    C6    C5      119.0(7)  yes
                       N2    C6    C4      110.9(6)  yes
                       C5    C6    C7      125.1(7)  yes
                       C4    C6    C7      130.0(7)  yes
                       N2    C6    C7      106.4(6)  yes
                       C6    C7    C8      106.8(8)  yes
                       C7    C8    C9      108.5(8)  yes
                       N2    C9    C8      110.7(7)  yes
                       C8    C9    C10     125.4(8)  yes
                       N2    C9    C10     123.9(8)  yes
                       C9    C10   C28     108.5(7)  yes
                       C9    C10   C26     106.9(7)  yes
                       C9    C10   C11     113.6(7)  yes
                       C26   C10   C28     107.3(7)  yes
                       C11   C10   C28     112.9(7)  yes
                       C11   C10   C26     107.2(7)  yes
                       N3    C11   C10     122.7(7)  yes
                       C10   C11   C12     129.7(8)  yes
                       N3    C11   C12     107.6(7)  yes
                       C11   C12   C13     108.5(7)  yes
                       C12   C13   C14     106.8(8)  yes
                       N3    C14   C13     110.1(8)  yes
                       C13   C14   C15     130.2(8)  yes
                       N3    C14   C15     118.7(7)  yes
                       C14   C15   C32     109.2(7)  yes
                       C14   C15   C30     110.1(7)  yes
                       C14   C15   C16     112.9(7)  yes
                       C30   C15   C32     107.3(7)  yes
                       C16   C15   C32     112.5(7)  yes
                       C16   C15   C30     104.6(6)  yes
                       N4    C16   C15     118.7(7)  yes
                       C15   C16   C17     119.0(7)  yes
                       N4    C16   C17     122.0(8)  yes
                       C16   C17   C18     120.7(8)  yes
                       C17   C18   C19     118.5(9)  yes
                       C18   C19   C20     121.5(9)  yes
                       N4    C20   C19     120.1(8)  yes
                       C19   C20   C21     121.8(8)  yes
                       N4    C20   C21     118.0(7)  yes
                       C1    C21   C20     115.4(7)  yes
                       C20   C21   C36     110.4(6)  yes
                       C20   C21   C34     109.7(7)  yes
                       C1    C21   C36     107.4(7)  yes
                       C1    C21   C34     105.6(6)  yes
                       C34   C21   C36     107.9(7)  yes
                       C5    C22   C23     110.8(8)  yes
                       C5    C24   C25     112.5(7)  yes
                       C10   C26   C27     114.0(8)  yes
                       C10   C28   C29     113.4(8)  yes
                       C15   C30   C31     114.9(6)  yes
                       C15   C32   C33     116.3(8)  yes
                       C21   C34   C35     114.1(8)  yes
                       C21   C36   C37     117.0(8)  yes
                       C53   B1    C59     107.9(7)  yes
                       C47   B1    C59     109.5(7)  yes
                       C47   B1    C53     114.3(8)  yes
                       C41   B1    C59     109.5(8)  yes
                       C41   B1    C53     110.3(7)  yes
                       C41   B1    C47     105.3(8)  yes
                       B1    C41   C46     120.3(7)  yes
                       B1    C41   C42     125.2(8)  yes
                       C42   C41   C46     114.5(8)  yes
                       C41   C42   C43     122.2(8)  yes
                       C42   C43   C44     121.2(9)  yes
                       C43   C44   C45     118.5(9)  yes
                       C44   C45   C46     120.9(9)  yes
                       C41   C46   C45     122.6(8)  yes
                       B1    C47   C52     121.6(8)  yes
                       B1    C47   C48     124.7(7)  yes
                       C48   C47   C52     113.8(8)  yes
                       C47   C48   C49     123.0(8)  yes
                       C48   C49   C50     120.4(9)  yes
                       C49   C50   C51     118.6(9)  yes
                       C50   C51   C52     120.6(9)  yes
                       C47   C52   C51     123.6(9)  yes
                       B1    C53   C58     122.2(7)  yes
                       B1    C53   C54     123.0(8)  yes
                       C54   C53   C58     114.6(8)  yes
                       C53   C54   C55     123.3(9)  yes
                       C54   C55   C56     120.0(8)  yes
                       C55   C56   C57     118.4(9)  yes
                       C56   C57   C58     121.0(9)  yes
                       C53   C58   C57     122.7(8)  yes
                       B1    C59   C64     120.2(8)  yes
                       B1    C59   C60     124.4(8)  yes
                       C60   C59   C64     115.3(8)  yes
                       C59   C60   C61     122.9(9)  yes
                       C60   C61   C62     121.2(9)  yes
                       C61   C62   C63     117.1(9)  yes
                       C62   C63   C64     122.3(9)  yes
                       C59   C64   C63     121.2(8)  yes
 
_refine_diff_density_max          0.516
_refine_diff_density_min          -0.554
_refine_diff_density_rms          0.094


data_COMPLEX9

_chemical_name_common             ?
_chemical_formula_moiety          ?
_chemical_formula_structural      ?
_chemical_formula_analytical      ?
_chemical_formula_sum             'C78H108N8Ni2O'
_chemical_formula_weight          1291.18
_chemical_melting_point           ?
_chemical_compound_source         ?

loop_
 _atom_type_symbol
 _atom_type_description 
 _atom_type_scat_dispersion_real 
 _atom_type_scat_dispersion_imag 
 _atom_type_scat_source 
 'C'  'C'   0.0033   0.0016 
 'International Tables Vol C Tables 4.2.6.8 and 6.1.1.4' 
 'H'  'H'   0.0000   0.0000 
 'International Tables Vol C Tables 4.2.6.8 and 6.1.1.4' 
 'Ni'  'Ni'   0.3393   1.1124 
 'International Tables Vol C Tables 4.2.6.8 and 6.1.1.4' 
 'N'  'N'   0.0061   0.0033 
 'International Tables Vol C Tables 4.2.6.8 and 6.1.1.4' 
 'O'  'O'   0.0106   0.0060 
 'International Tables Vol C Tables 4.2.6.8 and 6.1.1.4' 
 
_symmetry_cell_setting            monoclinic
_symmetry_space_group_name_H-M    'C2/C'

loop_
 _symmetry_equiv_pos_as_xyz
 'x, y, z' 
 '-x, y, -z+1/2' 
 'x+1/2, y+1/2, z' 
 '-x+1/2, y+1/2, -z+1/2' 
 '-x, -y, -z' 
 'x, -y, z-1/2' 
 '-x+1/2, -y+1/2, -z' 
 'x+1/2, -y+1/2, z-1/2' 
 
_cell_length_a                    15.999(3)
_cell_length_b                    16.855(3)
_cell_length_c                    27.157(5)
_cell_angle_alpha                 90.00(0)
_cell_angle_beta                  106.02(3)
_cell_angle_gamma                 90.00(0)
_cell_volume                      7039.(2)
_cell_formula_units_Z             4.00
_cell_measurement_temperature     200
_cell_measurement_reflns_used     295
_cell_measurement_theta_min       8.2
_cell_measurement_theta_max       22.5

_exptl_crystal_description        prism
_exptl_crystal_colour             red
_exptl_crystal_size_max           0.30
_exptl_crystal_size_mid           0.18
_exptl_crystal_size_min           0.16
_exptl_crystal_density_meas       not_measured
_exptl_crystal_density_diffrn     1.2184
_exptl_crystal_density_method     not_measured
_exptl_crystal_F_000              2784.0
_exptl_absorpt_coefficient_mu     0.5845
_exptl_absorpt_correction_type    'none'
_exptl_absorpt_correction_T_min   0.952
_exptl_absorpt_correction_T_max   1.000

_exptl_special_details
;
 ?
;

_diffrn_ambient_temperature       295
_diffrn_radiation_wavelength      0.71069
_diffrn_radiation_type            MoKa
_diffrn_radiation_source          'fine-focussealedtube'
_diffrn_radiation_monochromator   graphite
_diffrn_measurement_device        'Stoe IPDS'
_diffrn_measurement_method        ?
_diffrn_standards_number          ?
_diffrn_standards_interval_count  ?
_diffrn_standards_interval_time   ?
_diffrn_standards_decay_%         ?
_diffrn_reflns_number             22355
_diffrn_reflns_av_R_equivalents   0.0582
_diffrn_reflns_av_sigmaI/netI     0.0416
_diffrn_reflns_limit_h_min        -18
_diffrn_reflns_limit_h_max        18
_diffrn_reflns_limit_k_min        -19
_diffrn_reflns_limit_k_max        19
_diffrn_reflns_limit_l_min        -30
_diffrn_reflns_limit_l_max        31
_diffrn_reflns_theta_min          1.79
_diffrn_reflns_theta_max          24.08
_reflns_number_total              5554
_reflns_number_observed           4278
_reflns_observed_criterion        >2sigma(I)

_computing_data_collection        'STOE Program Package'
_computing_cell_refinement        'STOE Program Package'
_computing_data_reduction         'STOE Program Package'
_computing_structure_solution     'SHELXS-76 (Sheldrick, 1976)'
_computing_structure_refinement   'SHELXS-93 (Sheldrick, 1993)'
_computing_molecular_graphics     ?
_computing_publication_material   ?

_refine_special_details
;
 Refinement on F^2^ for ALL reflections except for 316 with very negative F^2^ 
 or flagged by the user for potential systematic errors.  Weighted R-factors 
 wR and all goodnesses of fit S are based on F^2^, conventional R-factors R 
 are based on F, with F set to zero for negative F^2^. The observed criterion 
 of F^2^ > 2sigma(F^2^) is used only for calculating  R factor obs etc. and is 
 not relevant to the choice of reflections for refinement.  R-factors based 
 on F^2^ are statistically about twice as large as those based on F, and R- 
 factors based on ALL data will be even larger. 
; 

_refine_ls_structure_factor_coef  Fsqd
_refine_ls_matrix_type            full
_refine_ls_weighting_scheme 
 'calc w=1/[s^2^(Fo^2^)+( 0.0621P)^2^+0.0000P] where P=(Fo^2^+2Fc^2^)/3' 
_atom_sites_solution_primary      direct
_atom_sites_solution_secondary    difmap
_atom_sites_solution_hydrogens    difmap
_refine_ls_hydrogen_treatment     not_refined
_refine_ls_extinction_method      none
_refine_ls_extinction_coef        ?
_refine_ls_number_reflns          5238
_refine_ls_number_parameters      402
_refine_ls_number_restraints      0
_refine_ls_R_factor_all           0.0551
_refine_ls_R_factor_obs           0.0372
_refine_ls_wR_factor_all          0.0989
_refine_ls_wR_factor_obs          0.0875
_refine_ls_goodness_of_fit_all    0.969
_refine_ls_goodness_of_fit_obs    1.026
_refine_ls_restrained_S_all       1.010
_refine_ls_restrained_S_obs       1.026
_refine_ls_shift/esd_max          0.001
_refine_ls_shift/esd_mean         0.000

loop_
    _atom_site_label
    _atom_site_fract_x
    _atom_site_fract_y
    _atom_site_fract_z
    _atom_site_U_iso_or_equiv
    _atom_site_thermal_displace_type
    _atom_site_type_symbol
    _atom_site_calc_flag
    _atom_site_calc_attached_atom
    _atom_site_aniso_ratio
#
#  R=Rmax./Rmin.=ratio of the maximum and minimum
#                principal axes of atomic displacement ellipsoids
#
#                     Table of coordinates
#                     --------------------
#
#label    x/a         y/b         z/c        Ueq       tmf  typ .    att   R
 
 NI1    0.16971(2)  0.22118(2)  0.13593(1) 0.0324(1)  aniso Ni  .   .     2.25
 O1     0.00000(0) -0.0823(2)   0.25000(0) 0.0678(12) aniso O   .   .     2.08
 N1     0.1481(1)   0.3161(1)   0.1644(1)  0.0349(6)  aniso N   .   .     2.02
 N2     0.0970(1)   0.1689(1)   0.1701(1)  0.0360(7)  aniso N   .   .     2.18
 N3     0.1873(1)   0.1249(1)   0.1075(1)  0.0367(7)  aniso N   .   .     2.07
 N4     0.2389(1)   0.2752(1)   0.0967(1)  0.0337(7)  aniso N   .   .     1.75
 C1     0.1304(2)   0.3850(1)   0.1376(1)  0.0393(8)  aniso C   .   .     1.88
 C2     0.1026(2)   0.4403(2)   0.1667(1)  0.0515(10) aniso C   .   .     2.96
 C3     0.1036(2)   0.4041(2)   0.2133(1)  0.0511(10) aniso C   .   .     2.99
 C4     0.1319(2)   0.3276(1)   0.2109(1)  0.0390(9)  aniso C   .   .     2.13
 C5     0.1418(2)   0.2585(1)   0.2481(1)  0.0396(8)  aniso C   .   .     2.04
 C6     0.0831(2)   0.1937(1)   0.2187(1)  0.0356(8)  aniso C   .   .     2.17
 C7     0.0189(2)   0.1502(1)   0.2281(1)  0.0386(8)  aniso C   .   .     2.40
 C8    -0.0106(2)   0.0912(1)   0.1855(1)  0.0441(9)  aniso C   .   .     2.41
 C9     0.0449(2)   0.1104(1)   0.1512(1)  0.0394(9)  aniso C   .   .     2.00
 C10    0.0394(2)   0.0706(2)   0.0998(1)  0.0446(9)  aniso C   .   .     2.21
 C11    0.1290(2)   0.0640(1)   0.0928(1)  0.0427(9)  aniso C   .   .     2.20
 C12    0.1683(2)   0.0041(2)   0.0722(1)  0.0511(11) aniso C   .   .     2.64
 C13    0.2535(2)   0.0286(2)   0.0758(1)  0.0481(10) aniso C   .   .     2.77
 C14    0.2637(2)   0.1031(1)   0.0979(1)  0.0379(8)  aniso C   .   .     2.06
 C15    0.3397(2)   0.1583(1)   0.1140(1)  0.0398(8)  aniso C   .   .     2.29
 C16    0.3101(1)   0.2387(1)   0.0876(1)  0.0361(8)  aniso C   .   .     2.00
 C17    0.3512(2)   0.2715(2)   0.0540(1)  0.0442(9)  aniso C   .   .     2.33
 C18    0.3216(2)   0.3406(2)   0.0288(1)  0.0455(9)  aniso C   .   .     2.31
 C19    0.2519(2)   0.3776(1)   0.0391(1)  0.0427(9)  aniso C   .   .     1.93
 C20    0.2115(2)   0.3459(1)   0.0734(1)  0.0358(8)  aniso C   .   .     1.49
 C21    0.1308(2)   0.3874(1)   0.0821(1)  0.0388(8)  aniso C   .   .     1.91
 C22    0.2364(2)   0.2265(2)   0.2635(1)  0.0501(9)  aniso C   .   .     1.67
 C23    0.2514(2)   0.1563(2)   0.2991(1)  0.0755(15) aniso C   .   .     1.93
 C24    0.1160(2)   0.2847(2)   0.2965(1)  0.0488(9)  aniso C   .   .     2.26
 C25    0.1801(2)   0.3409(2)   0.3323(1)  0.0735(13) aniso C   .   .     2.88
 C26   -0.0042(2)  -0.0117(2)   0.0963(1)  0.0635(13) aniso C   .   .     3.36
 C27    0.0431(3)  -0.0747(2)   0.1321(2)  0.0836(16) aniso C   .   .     3.58
 C28   -0.0167(2)   0.1234(2)   0.0564(1)  0.0627(12) aniso C   .   .     1.57
 C29   -0.1081(3)   0.1441(3)   0.0558(2)  0.1009(18) aniso C   .   .     2.01
 C30    0.3675(2)   0.1693(2)   0.1726(1)  0.0492(9)  aniso C   .   .     1.31
 C31    0.3819(2)   0.0932(2)   0.2031(1)  0.0718(13) aniso C   .   .     1.98
 C32    0.4172(2)   0.1225(2)   0.0974(1)  0.0501(9)  aniso C   .   .     2.56
 C33    0.5057(2)   0.1609(2)   0.1182(1)  0.0666(12) aniso C   .   .     2.75
 C34    0.1242(2)   0.4746(2)   0.0638(1)  0.0526(11) aniso C   .   .     2.51
 C35    0.1976(2)   0.5289(2)   0.0893(1)  0.0669(12) aniso C   .   .     2.92
 C36    0.0506(2)   0.3426(2)   0.0486(1)  0.0498(8)  aniso C   .   .     1.44
 C37   -0.0373(2)   0.3634(2)   0.0566(2)  0.0808(15) aniso C   .   .     2.35
 C38    0.0782(4)  -0.1277(2)   0.2684(2)  0.1086(23) aniso C   .   .     5.23
 C39    0.1525(3)  -0.0745(4)   0.2835(2)  0.1397(24) aniso C   .   .     6.06
 H2     0.08380(0)  0.48860(0)  0.15560(0) 0.0800(0)  iso   H   .   C2    1.00
 H3     0.08900(0)  0.42070(0)  0.24140(0) 0.0800(0)  iso   H   .   C3    1.00
 H81   -0.07120(0)  0.09530(0)  0.16840(0) 0.0800(0)  iso   H   .   C8    1.00
 H82    0.00010(0)  0.03880(0)  0.19870(0) 0.0800(0)  iso   H   .   C8    1.00
 H12    0.14030(0) -0.04460(0)  0.05860(0) 0.0800(0)  iso   H   .   C12   1.00
 H13    0.29980(0)  0.00230(0)  0.06920(0) 0.0800(0)  iso   H   .   C13   1.00
 H17    0.39870(0)  0.24550(0)  0.04880(0) 0.0800(0)  iso   H   .   C17   1.00
 H18    0.34750(0)  0.36040(0)  0.00580(0) 0.0800(0)  iso   H   .   C18   1.00
 H19    0.23470(0)  0.42210(0)  0.02300(0) 0.0800(0)  iso   H   .   C19   1.00
 H221   0.24480(0)  0.21120(0)  0.23390(0) 0.0800(0)  iso   H   .   C22   1.00
 H222   0.27480(0)  0.27260(0)  0.28140(0) 0.0800(0)  iso   H   .   C22   1.00
 H231   0.30930(0)  0.13260(0)  0.30540(0) 0.0800(0)  iso   H   .   C23   1.00
 H232   0.20640(0)  0.11250(0)  0.28240(0) 0.0800(0)  iso   H   .   C23   1.00
 H233   0.23760(0)  0.16850(0)  0.33100(0) 0.0800(0)  iso   H   .   C23   1.00
 H241   0.11600(0)  0.23570(0)  0.31790(0) 0.0800(0)  iso   H   .   C24   1.00
 H242   0.06240(0)  0.31010(0)  0.28750(0) 0.0800(0)  iso   H   .   C24   1.00
 H251   0.15860(0)  0.35800(0)  0.35900(0) 0.0800(0)  iso   H   .   C25   1.00
 H252   0.19200(0)  0.38060(0)  0.31530(0) 0.0800(0)  iso   H   .   C25   1.00
 H253   0.23990(0)  0.31230(0)  0.35040(0) 0.0800(0)  iso   H   .   C25   1.00
 H261  -0.05970(0) -0.00640(0)  0.10140(0) 0.0800(0)  iso   H   .   C26   1.00
 H262  -0.01220(0) -0.02750(0)  0.05880(0) 0.0800(0)  iso   H   .   C26   1.00
 H271   0.00960(0) -0.12290(0)  0.12420(0) 0.0800(0)  iso   H   .   C27   1.00
 H272   0.05710(0) -0.06300(0)  0.16700(0) 0.0800(0)  iso   H   .   C27   1.00
 H273   0.10280(0) -0.08780(0)  0.12870(0) 0.0800(0)  iso   H   .   C27   1.00
 H281   0.01270(0)  0.16610(0)  0.05740(0) 0.0800(0)  iso   H   .   C28   1.00
 H282  -0.03160(0)  0.09960(0)  0.01820(0) 0.0800(0)  iso   H   .   C28   1.00
 H291  -0.13940(0)  0.17980(0)  0.02110(0) 0.0800(0)  iso   H   .   C29   1.00
 H292  -0.10930(0)  0.17690(0)  0.08660(0) 0.0800(0)  iso   H   .   C29   1.00
 H293  -0.14280(0)  0.09260(0)  0.05600(0) 0.0800(0)  iso   H   .   C29   1.00
 H301   0.41670(0)  0.19830(0)  0.17980(0) 0.0800(0)  iso   H   .   C30   1.00
 H302   0.32120(0)  0.19950(0)  0.18100(0) 0.0800(0)  iso   H   .   C30   1.00
 H311   0.40020(0)  0.10490(0)  0.23740(0) 0.0800(0)  iso   H   .   C31   1.00
 H312   0.42970(0)  0.06020(0)  0.19510(0) 0.0800(0)  iso   H   .   C31   1.00
 H313   0.32740(0)  0.06360(0)  0.19320(0) 0.0800(0)  iso   H   .   C31   1.00
 H321   0.41810(0)  0.07190(0)  0.10840(0) 0.0800(0)  iso   H   .   C32   1.00
 H322   0.40080(0)  0.12250(0)  0.06220(0) 0.0800(0)  iso   H   .   C32   1.00
 H331   0.54980(0)  0.13720(0)  0.10340(0) 0.0800(0)  iso   H   .   C33   1.00
 H332   0.53050(0)  0.15420(0)  0.15500(0) 0.0800(0)  iso   H   .   C33   1.00
 H333   0.50580(0)  0.21490(0)  0.11530(0) 0.0800(0)  iso   H   .   C33   1.00
 H341   0.11330(0)  0.47690(0)  0.02630(0) 0.0800(0)  iso   H   .   C34   1.00
 H342   0.07000(0)  0.49610(0)  0.07090(0) 0.0800(0)  iso   H   .   C34   1.00
 H351   0.19140(0)  0.57660(0)  0.07690(0) 0.0800(0)  iso   H   .   C35   1.00
 H352   0.25240(0)  0.51460(0)  0.08640(0) 0.0800(0)  iso   H   .   C35   1.00
 H353   0.20940(0)  0.53530(0)  0.12600(0) 0.0800(0)  iso   H   .   C35   1.00
 H361   0.04940(0)  0.34800(0)  0.01210(0) 0.0800(0)  iso   H   .   C36   1.00
 H362   0.06070(0)  0.28520(0)  0.05630(0) 0.0800(0)  iso   H   .   C36   1.00
 H371  -0.08790(0)  0.33150(0)  0.03160(0) 0.0800(0)  iso   H   .   C37   1.00
 H372  -0.04070(0)  0.42230(0)  0.05340(0) 0.0800(0)  iso   H   .   C37   1.00
 H373  -0.03330(0)  0.35360(0)  0.09100(0) 0.0800(0)  iso   H   .   C37   1.00
 H381   0.07610(0) -0.15950(0)  0.24070(0) 0.0800(0)  iso   H   .   C38   1.00
 H382   0.07540(0) -0.16010(0)  0.30060(0) 0.0800(0)  iso   H   .   C38   1.00
 H391   0.20640(0) -0.09760(0)  0.29530(0) 0.0800(0)  iso   H   .   C39   1.00
 H392   0.14950(0) -0.03490(0)  0.31080(0) 0.0800(0)  iso   H   .   C39   1.00
 H393   0.15300(0) -0.04580(0)  0.25030(0) 0.0800(0)  iso   H   .   C39   1.00

loop_
    _atom_site_aniso_label
    _atom_site_aniso_U_11
    _atom_site_aniso_U_22
    _atom_site_aniso_U_33
    _atom_site_aniso_U_23
    _atom_site_aniso_U_13
    _atom_site_aniso_U_12

#label   U11         U22         U33         U23         U13         U12

NI1   0.0371(2)   0.0275(2)   0.0397(2)  -0.0022(1)   0.0227(1)  -0.0009(1)
O1    0.0774(20)  0.0430(15)  0.0872(21)  0.0000(0)   0.0299(17)  0.0000(0)
N1    0.0432(11)  0.0284(10)  0.0397(11) -0.0018(8)   0.0229(9)  -0.0005(9)
N2    0.0409(11)  0.0303(10)  0.0443(11) -0.0040(8)   0.0245(9)  -0.0020(9)
N3    0.0421(11)  0.0323(10)  0.0430(11) -0.0032(8)   0.0239(9)  -0.0009(9)
N4    0.0369(10)  0.0297(10)  0.0397(10) -0.0002(8)   0.0192(8)   0.0012(9)
C1    0.0450(13)  0.0317(12)  0.0476(14)  0.0000(10)  0.0235(11)  0.0026(11)
C2    0.0725(19)  0.0327(13)  0.0599(17)  0.0020(11)  0.0363(15)  0.0110(13)
C3    0.0699(18)  0.0376(14)  0.0582(16) -0.0103(12)  0.0383(14) -0.0013(13)
C4    0.0488(14)  0.0338(13)  0.0421(13) -0.0053(10)  0.0254(11) -0.0048(11)
C5    0.0478(14)  0.0375(13)  0.0404(13) -0.0031(10)  0.0239(11) -0.0053(11)
C6    0.0407(13)  0.0322(12)  0.0414(13)  0.0003(10)  0.0239(10)  0.0017(10)
C7    0.0427(13)  0.0320(12)  0.0502(14) -0.0005(10)  0.0281(11)  0.0014(11)
C8    0.0464(14)  0.0370(13)  0.0582(16) -0.0050(11)  0.0300(12) -0.0077(11)
C9    0.0434(13)  0.0328(12)  0.0497(14) -0.0035(10)  0.0255(11) -0.0028(11)
C10   0.0471(14)  0.0405(14)  0.0533(15) -0.0119(11)  0.0258(12) -0.0123(12)
C11   0.0558(15)  0.0344(13)  0.0462(14) -0.0076(10)  0.0279(12) -0.0079(12)
C12   0.0680(18)  0.0364(14)  0.0585(16) -0.0117(12)  0.0336(14) -0.0055(13)
C13   0.0607(16)  0.0344(13)  0.0603(16) -0.0032(11)  0.0352(13)  0.0058(12)
C14   0.0440(13)  0.0338(12)  0.0430(13)  0.0022(10)  0.0242(11)  0.0046(11)
C15   0.0388(13)  0.0369(13)  0.0503(14)  0.0016(11)  0.0232(11)  0.0080(11)
C16   0.0335(12)  0.0345(13)  0.0457(13) -0.0040(10)  0.0198(10)  0.0002(10)
C17   0.0415(13)  0.0435(14)  0.0564(15)  0.0016(12)  0.0282(12)  0.0001(12)
C18   0.0502(14)  0.0447(14)  0.0510(15)  0.0010(12)  0.0297(12) -0.0049(12)
C19   0.0506(14)  0.0359(13)  0.0488(14)  0.0035(11)  0.0259(12) -0.0001(12)
C20   0.0374(12)  0.0341(12)  0.0395(12) -0.0022(10)  0.0168(10) -0.0025(10)
C21   0.0433(13)  0.0333(12)  0.0456(14)  0.0030(10)  0.0220(11)  0.0064(11)
C22   0.0484(14)  0.0602(17)  0.0446(14)  0.0043(12)  0.0175(12) -0.0045(14)
C23   0.0637(19)  0.0847(23)  0.0794(22)  0.0251(18)  0.0216(17)  0.0108(18)
C24   0.0625(16)  0.0479(14)  0.0442(14) -0.0070(12)  0.0284(12) -0.0095(14)
C25   0.0943(24)  0.0787(22)  0.0563(18) -0.0221(16)  0.0355(17) -0.0264(20)
C26   0.0751(20)  0.0513(17)  0.0794(21) -0.0242(15)  0.0467(17) -0.0268(16)
C27   0.1258(32)  0.0451(18)  0.1044(27) -0.0119(17)  0.0724(25) -0.0153(19)
C28   0.0516(16)  0.0693(20)  0.0664(19) -0.0046(15)  0.0151(14) -0.0097(15)
C29   0.0707(23)  0.1261(36)  0.1104(31)  0.0122(26)  0.0323(22)  0.0068(24)
C30   0.0452(14)  0.0510(16)  0.0531(15)  0.0000(12)  0.0164(12)  0.0045(13)
C31   0.0844(23)  0.0702(21)  0.0575(19)  0.0133(15)  0.0141(16)  0.0149(18)
C32   0.0459(15)  0.0449(15)  0.0679(17)  0.0026(12)  0.0300(13)  0.0104(12)
C33   0.0439(16)  0.0682(20)  0.0928(23)  0.0007(17)  0.0274(15)  0.0127(15)
C34   0.0642(17)  0.0384(14)  0.0642(17)  0.0118(12)  0.0331(14)  0.0132(13)
C35   0.0924(23)  0.0365(14)  0.0843(22)  0.0011(14)  0.0456(19) -0.0027(16)
C36   0.0431(14)  0.0564(16)  0.0522(15)  0.0025(12)  0.0169(12)  0.0025(13)
C37   0.0501(18)  0.1022(28)  0.0951(26) -0.0056(21)  0.0286(17) -0.0023(18)
C38   0.1581(45)  0.0734(26)  0.1036(31)  0.0159(22)  0.0514(31)  0.0655(30)
C39   0.0790(29)  0.1607(51)  0.1503(45) -0.0574(38) -0.0170(29)  0.0623(33)

loop_
_geom_bond_atom_site_label_1
_geom_bond_atom_site_label_2
_geom_bond_distance
_geom_bond_publ_flag
 
                      NI1   N1      1.850(2)   yes
                      NI1   N2      1.894(2)   yes
                      NI1   N3      1.852(2)   yes
                      NI1   N4      1.960(2)   yes
                      O1    C38     1.434(6)   yes
                      N1    C1      1.358(3)   yes
                      N1    C4      1.371(4)   yes
                      N2    C6      1.459(4)   yes
                      N2    C9      1.302(3)   yes
                      N3    C11     1.370(3)   yes
                      N3    C14     1.369(4)   yes
                      N4    C16     1.376(3)   yes
                      N4    C20     1.364(3)   yes
                      C1    C2      1.373(4)   yes
                      C1    C21     1.510(4)   yes
                      C2    C3      1.401(4)   yes
                      C3    C4      1.374(4)   yes
                      C4    C5      1.521(3)   yes
                      C5    C6      1.516(3)   yes
                      C5    C22     1.551(4)   yes
                      C5    C24     1.547(4)   yes
                      C6    C7      1.343(4)   yes
                      C7    C8      1.500(3)   yes
                      C8    C9      1.489(5)   yes
                      C9    C10     1.529(4)   yes
                      C10   C11     1.501(5)   yes
                      C10   C26     1.544(5)   yes
                      C10   C28     1.550(4)   yes
                      C11   C12     1.386(4)   yes
                      C12   C13     1.402(5)   yes
                      C13   C14     1.382(4)   yes
                      C14   C15     1.497(4)   yes
                      C15   C16     1.545(3)   yes
                      C15   C30     1.541(4)   yes
                      C15   C32     1.554(5)   yes
                      C16   C17     1.379(4)   yes
                      C17   C18     1.368(5)   yes
                      C18   C19     1.372(5)   yes
                      C19   C20     1.380(4)   yes
                      C20   C21     1.543(4)   yes
                      C21   C34     1.546(4)   yes
                      C21   C36     1.549(4)   yes
                      C22   C23     1.505(4)   yes
                      C24   C25     1.531(4)   yes
                      C26   C27     1.496(5)   yes
                      C28   C29     1.499(6)   yes
                      C30   C31     1.510(5)   yes
                      C32   C33     1.517(4)   yes
                      C34   C35     1.499(4)   yes
                      C36   C37     1.522(5)   yes
                      C38   C39     1.455(8)   yes
 
loop_
_geom_angle_atom_site_label_1
_geom_angle_atom_site_label_2
_geom_angle_atom_site_label_3
_geom_angle
_geom_angle_publ_flag
 
                       N3    NI1   N4       90.4(1)  yes
                       N2    NI1   N4      176.4(1)  yes
                       N2    NI1   N3       88.9(1)  yes
                       N1    NI1   N4       91.4(1)  yes
                       N1    NI1   N3      177.9(1)  yes
                       N1    NI1   N2       89.2(1)  yes
                       NI1   N1    C4      127.7(1)  yes
                       NI1   N1    C1      123.4(2)  yes
                       C1    N1    C4      107.9(2)  yes
                       NI1   N2    C9      124.9(2)  yes
                       NI1   N2    C6      125.3(1)  yes
                       C6    N2    C9      109.4(2)  yes
                       NI1   N3    C14     124.1(2)  yes
                       NI1   N3    C11     127.5(2)  yes
                       C11   N3    C14     108.4(2)  yes
                       NI1   N4    C20     120.1(2)  yes
                       NI1   N4    C16     120.7(1)  yes
                       C16   N4    C20     118.9(2)  yes
                       N1    C1    C21     120.0(2)  yes
                       N1    C1    C2      108.9(2)  yes
                       C2    C1    C21     130.4(2)  yes
                       C1    C2    C3      107.4(3)  yes
                       C2    C3    C4      106.7(3)  yes
                       N1    C4    C3      109.0(2)  yes
                       C3    C4    C5      131.5(2)  yes
                       N1    C4    C5      119.5(2)  yes
                       C4    C5    C24     110.0(2)  yes
                       C4    C5    C22     111.1(2)  yes
                       C4    C5    C6      105.4(2)  yes
                       C22   C5    C24     109.8(2)  yes
                       C6    C5    C24     112.4(2)  yes
                       C6    C5    C22     107.9(2)  yes
                       N2    C6    C5      117.1(2)  yes
                       C5    C6    C7      133.5(2)  yes
                       N2    C6    C7      109.3(2)  yes
                       C6    C7    C8      108.1(2)  yes
                       C7    C8    C9      102.9(2)  yes
                       N2    C9    C8      110.2(2)  yes
                       C8    C9    C10     125.6(2)  yes
                       N2    C9    C10     124.2(2)  yes
                       C9    C10   C28     108.5(2)  yes
                       C9    C10   C26     111.2(2)  yes
                       C9    C10   C11     109.4(2)  yes
                       C26   C10   C28     108.2(3)  yes
                       C11   C10   C28     108.6(3)  yes
                       C11   C10   C26     110.9(3)  yes
                       N3    C11   C10     120.3(2)  yes
                       C10   C11   C12     131.3(3)  yes
                       N3    C11   C12     108.4(2)  yes
                       C11   C12   C13     107.3(3)  yes
                       C12   C13   C14     107.1(3)  yes
                       N3    C14   C13     108.8(3)  yes
                       C13   C14   C15     132.9(3)  yes
                       N3    C14   C15     118.3(2)  yes
                       C14   C15   C32     108.8(2)  yes
                       C14   C15   C30     110.9(2)  yes
                       C14   C15   C16     106.8(2)  yes
                       C30   C15   C32     108.7(2)  yes
                       C16   C15   C32     111.9(2)  yes
                       C16   C15   C30     109.8(2)  yes
                       N4    C16   C15     118.2(2)  yes
                       C15   C16   C17     121.2(2)  yes
                       N4    C16   C17     120.6(2)  yes
                       C16   C17   C18     120.7(3)  yes
                       C17   C18   C19     118.3(3)  yes
                       C18   C19   C20     121.3(2)  yes
                       N4    C20   C19     120.1(2)  yes
                       C19   C20   C21     119.7(2)  yes
                       N4    C20   C21     120.0(2)  yes
                       C1    C21   C20     112.0(2)  yes
                       C20   C21   C36     106.3(2)  yes
                       C20   C21   C34     111.6(3)  yes
                       C1    C21   C36     110.0(2)  yes
                       C1    C21   C34     109.1(2)  yes
                       C34   C21   C36     107.6(2)  yes
                       C5    C22   C23     114.7(3)  yes
                       C5    C24   C25     115.3(3)  yes
                       C10   C26   C27     117.3(3)  yes
                       C10   C28   C29     120.0(3)  yes
                       C15   C30   C31     114.9(2)  yes
                       C15   C32   C33     117.6(3)  yes
                       C21   C34   C35     117.2(3)  yes
                       C21   C36   C37     116.9(3)  yes
                       O1    C38   C39     109.6(4)  yes
 
_refine_diff_density_max          0.376
_refine_diff_density_min          -0.208
_refine_diff_density_rms          0.046


data_COMPLEX11

_chemical_name_common             ?
_chemical_formula_moiety          ?
_chemical_formula_structural      ?
_chemical_formula_analytical      ?
_chemical_formula_sum             'C41H57LiN4O'
_chemical_formula_weight          628.87
_chemical_melting_point           ?
_chemical_compound_source         ?

loop_
 _atom_type_symbol
 _atom_type_description 
 _atom_type_scat_dispersion_real 
 _atom_type_scat_dispersion_imag 
 _atom_type_scat_source 
 'Li'  'Li'   0.0008   0.0003 
 'International Tables Vol C Tables 4.2.6.8 and 6.1.1.4' 
 'O'  'O'   0.0492   0.0322 
 'International Tables Vol C Tables 4.2.6.8 and 6.1.1.4' 
 'N'  'N'   0.0311   0.0180 
 'International Tables Vol C Tables 4.2.6.8 and 6.1.1.4' 
 'C'  'C'   0.0181   0.0091 
 'International Tables Vol C Tables 4.2.6.8 and 6.1.1.4' 
 'H'  'H'   0.0000   0.0000 
 'International Tables Vol C Tables 4.2.6.8 and 6.1.1.4' 
 
_symmetry_cell_setting            triclinic
_symmetry_space_group_name_H-M    'P-1'

loop_
 _symmetry_equiv_pos_as_xyz
 'x, y, z' 
 '-x, -y, -z' 
 
_cell_length_a                    11.815(2)
_cell_length_b                    15.94(3)
_cell_length_c                    11.26(2)
_cell_angle_alpha                 99.07(2)
_cell_angle_beta                  113.88(3)
_cell_angle_gamma                 71.87(2)
_cell_volume                      1842.(5)
_cell_formula_units_Z             2.00
_cell_measurement_temperature     25
_cell_measurement_reflns_used     143
_cell_measurement_theta_min       43.3
_cell_measurement_theta_max       64.0

_exptl_crystal_description        elongated_prism
_exptl_crystal_colour             yellow
_exptl_crystal_size_max           0.88
_exptl_crystal_size_mid           0.32
_exptl_crystal_size_min           0.20
_exptl_crystal_density_meas       not_measured
_exptl_crystal_density_diffrn     1.1339
_exptl_crystal_density_method     not_measured
_exptl_crystal_F_000              684.0
_exptl_absorpt_coefficient_mu     0.4832
_exptl_absorpt_correction_type    'North et al. 1968'
_exptl_absorpt_correction_T_min   0.540
_exptl_absorpt_correction_T_max   1.000

_exptl_special_details
;
 ?
;

_diffrn_ambient_temperature       143
_diffrn_radiation_wavelength      1.54178
_diffrn_radiation_type            CuKa
_diffrn_radiation_source          'fine-focussealedtube'
_diffrn_radiation_monochromator   graphite
_diffrn_measurement_device        'Rigaku AFC6S'
_diffrn_measurement_method        'omega/2theta'
_diffrn_standards_number          3
_diffrn_standards_interval_count  150
_diffrn_standards_interval_time   ?
_diffrn_standards_decay_%         0.2
_diffrn_reflns_number             7253
_diffrn_reflns_av_R_equivalents   0.0927
_diffrn_reflns_av_sigmaI/netI     0.1062
_diffrn_reflns_limit_h_min        -2
_diffrn_reflns_limit_h_max        14
_diffrn_reflns_limit_k_min        -19
_diffrn_reflns_limit_k_max        19
_diffrn_reflns_limit_l_min        -13
_diffrn_reflns_limit_l_max        12
_diffrn_reflns_theta_min          2.92
_diffrn_reflns_theta_max          70.15
_reflns_number_total              6890
_reflns_number_observed           3512
_reflns_observed_criterion        >2sigma(I)

_computing_data_collection        'TEXSAN Software'
_computing_cell_refinement        'TEXSAN Software'
_computing_data_reduction         'TEXSAN Software'
_computing_structure_solution     'SHELXS-86 (Sheldrick, 1990)'
_computing_structure_refinement   'SHELXS-93 (Sheldrick, 1993)'
_computing_molecular_graphics     ?
_computing_publication_material   ?

_refine_special_details
;
 Refinement on F^2^ for ALL reflections except for 1080 with very negative F^2^ 
 or flagged by the user for potential systematic errors.  Weighted R-factors 
 wR and all goodnesses of fit S are based on F^2^, conventional R-factors R 
 are based on F, with F set to zero for negative F^2^. The observed criterion 
 of F^2^ > 2sigma(F^2^) is used only for calculating  R factor obs etc. and is 
 not relevant to the choice of reflections for refinement.  R-factors based 
 on F^2^ are statistically about twice as large as those based on F, and R- 
 factors based on ALL data will be even larger. 
; 

_refine_ls_structure_factor_coef  Fsqd
_refine_ls_matrix_type            full
_refine_ls_weighting_scheme 
 'calc w=1/[s^2^(Fo^2^)+( 0.1112P)^2^+0.0152P] where P=(Fo^2^+2Fc^2^)/3' 
_atom_sites_solution_primary      direct
_atom_sites_solution_secondary    difmap
_atom_sites_solution_hydrogens    difmap
_refine_ls_hydrogen_treatment     not_refined
_refine_ls_extinction_method      none
_refine_ls_extinction_coef        ?
_refine_ls_number_reflns          5810
_refine_ls_number_parameters      424
_refine_ls_number_restraints      0
_refine_ls_R_factor_all           0.1551
_refine_ls_R_factor_obs           0.0636
_refine_ls_wR_factor_all          0.2309
_refine_ls_wR_factor_obs          0.1705
_refine_ls_goodness_of_fit_all    1.074
_refine_ls_goodness_of_fit_obs    1.214
_refine_ls_restrained_S_all       1.151
_refine_ls_restrained_S_obs       1.214
_refine_ls_shift/esd_max          0.000
_refine_ls_shift/esd_mean         0.000

loop_
    _atom_site_label
    _atom_site_fract_x
    _atom_site_fract_y
    _atom_site_fract_z
    _atom_site_U_iso_or_equiv
    _atom_site_thermal_displace_type
    _atom_site_type_symbol
    _atom_site_calc_flag
    _atom_site_calc_attached_atom
    _atom_site_aniso_ratio
#
#  R=Rmax./Rmin.=ratio of the maximum and minimum
#                principal axes of atomic displacement ellipsoids
#
#                     Table of coordinates
#                     --------------------
#
#label    x/a         y/b         z/c        Ueq       tmf  typ .    att   R
 
 LI1    0.7147(5)   0.2469(4)   0.0409(5)  0.0255(21) aniso Li  .   .     2.61
 O1     0.8151(2)   0.1242(2)   0.1177(2)  0.0288(10) aniso O   .   .     1.99
 N1     0.5056(2)   0.2367(2)  -0.0565(2)  0.0218(9)  aniso N   .   .     3.25
 N2     0.6232(3)   0.3364(2)   0.1664(3)  0.0271(12) aniso N   .   .     3.00
 N3     0.8278(2)   0.3273(2)   0.0585(2)  0.0203(10) aniso N   .   .     3.36
 N4     0.6886(3)   0.2296(2)  -0.2166(3)  0.0303(12) aniso N   .   .     4.00
 C1     0.4444(3)   0.2321(2)  -0.1849(3)  0.0258(13) aniso C   .   .     3.69
 C2     0.3196(3)   0.2948(2)  -0.2276(3)  0.0279(13) aniso C   .   .     2.62
 C3     0.3036(3)   0.3413(2)  -0.1217(4)  0.0306(14) aniso C   .   .     3.05
 C4     0.4194(3)   0.3049(2)  -0.0105(3)  0.0258(13) aniso C   .   .     2.63
 C5     0.4148(3)   0.3051(2)   0.1226(3)  0.0234(12) aniso C   .   .     2.82
 C6     0.4855(3)   0.3659(2)   0.1145(3)  0.0275(13) aniso C   .   .     3.79
 C7     0.4454(3)   0.4625(2)   0.1195(3)  0.0300(15) aniso C   .   .     2.23
 C8     0.5574(4)   0.4878(2)   0.1798(4)  0.0343(16) aniso C   .   .     1.46
 C9     0.6643(3)   0.4075(2)   0.2073(3)  0.0251(14) aniso C   .   .     2.03
 C10    0.8075(3)   0.3989(2)   0.2669(3)  0.0223(13) aniso C   .   .     3.31
 C11    0.8483(3)   0.3933(2)   0.1534(3)  0.0216(12) aniso C   .   .     2.97
 C12    0.9136(3)   0.4445(2)   0.1313(3)  0.0236(13) aniso C   .   .     2.92
 C13    0.9354(3)   0.4086(2)   0.0179(3)  0.0242(12) aniso C   .   .     1.86
 C14    0.8839(3)   0.3368(2)  -0.0228(3)  0.0236(12) aniso C   .   .     3.01
 C15    0.8891(3)   0.2721(2)  -0.1357(3)  0.0246(13) aniso C   .   .     2.22
 C16    0.7516(3)   0.2802(2)  -0.2332(3)  0.0294(15) aniso C   .   .     2.93
 C17    0.6931(4)   0.3407(3)  -0.3346(4)  0.0404(16) aniso C   .   .     2.56
 C18    0.5706(4)   0.3440(3)  -0.4206(4)  0.0475(18) aniso C   .   .     3.95
 C19    0.5087(4)   0.2892(3)  -0.4041(4)  0.0370(16) aniso C   .   .     2.32
 C20    0.5678(3)   0.2325(2)  -0.3023(3)  0.0280(14) aniso C   .   .     3.65
 C21    0.5040(3)   0.1713(2)  -0.2750(3)  0.0240(12) aniso C   .   .     2.77
 C22    0.2824(3)   0.3485(3)   0.1293(4)  0.0314(14) aniso C   .   .     2.88
 C23    0.2858(4)   0.3764(4)   0.2649(4)  0.0611(24) aniso C   .   .     4.84
 C24    0.4967(3)   0.2239(2)   0.2042(3)  0.0293(14) aniso C   .   .     2.87
 C25    0.4349(4)   0.1482(3)   0.1638(5)  0.0476(18) aniso C   .   .     3.71
 C26    0.8338(4)   0.4800(2)   0.3559(4)  0.0313(15) aniso C   .   .     1.90
 C27    0.8009(4)   0.4903(3)   0.4758(4)  0.0406(16) aniso C   .   .     2.17
 C28    0.8800(3)   0.3128(2)   0.3428(3)  0.0240(13) aniso C   .   .     2.81
 C29    1.0258(3)   0.2963(3)   0.3995(4)  0.0343(14) aniso C   .   .     3.38
 C30    0.9698(4)   0.2928(3)  -0.1995(4)  0.0343(16) aniso C   .   .     1.58
 C31    0.9891(4)   0.2289(3)  -0.3113(4)  0.0452(20) aniso C   .   .     2.28
 C32    0.9501(3)   0.1763(2)  -0.0876(3)  0.0241(12) aniso C   .   .     1.91
 C33    1.0888(3)   0.1606(2)   0.0089(4)  0.0318(14) aniso C   .   .     1.94
 C34    0.3984(3)   0.1490(2)  -0.4000(3)  0.0293(14) aniso C   .   .     4.51
 C35    0.3276(4)   0.0904(3)  -0.3791(4)  0.0391(16) aniso C   .   .     3.70
 C36    0.6041(3)   0.0873(2)  -0.2075(3)  0.0291(13) aniso C   .   .     2.11
 C37    0.6687(4)   0.0268(3)  -0.2926(4)  0.0363(14) aniso C   .   .     2.59
 C38    0.7622(4)   0.0610(2)   0.1406(4)  0.0345(16) aniso C   .   .     2.09
 C39    0.8275(4)   0.0503(3)   0.2879(4)  0.0474(18) aniso C   .   .     3.02
 C40    0.9600(4)   0.0627(3)   0.3196(4)  0.0410(16) aniso C   .   .     2.29
 C41    0.9509(3)   0.0946(2)   0.1942(4)  0.0320(15) aniso C   .   .     2.26
 H2     0.25490(0)  0.30650(0) -0.31330(0) 0.0500(0)  iso   H   .   C2    1.00
 H3     0.23330(0)  0.39130(0) -0.11460(0) 0.0500(0)  iso   H   .   C3    1.00
 H7     0.35880(0)  0.49660(0)  0.10270(0) 0.0500(0)  iso   H   .   C7    1.00
 H8     0.58050(0)  0.54210(0)  0.21950(0) 0.0500(0)  iso   H   .   C8    1.00
 H12    0.93820(0)  0.50330(0)  0.18160(0) 0.0500(0)  iso   H   .   C12   1.00
 H13    0.97820(0)  0.42590(0) -0.01680(0) 0.0500(0)  iso   H   .   C13   1.00
 H18    0.52950(0)  0.38290(0) -0.48950(0) 0.0500(0)  iso   H   .   C18   1.00
 H17    0.75190(0)  0.37430(0) -0.33390(0) 0.0500(0)  iso   H   .   C17   1.00
 H19    0.41730(0)  0.28380(0) -0.47970(0) 0.0500(0)  iso   H   .   C19   1.00
 H221   0.24040(0)  0.40070(0)  0.07630(0) 0.0500(0)  iso   H   .   C22   1.00
 H222   0.22910(0)  0.30820(0)  0.09240(0) 0.0500(0)  iso   H   .   C22   1.00
 H231   0.20070(0)  0.40360(0)  0.26340(0) 0.0500(0)  iso   H   .   C23   1.00
 H232   0.33660(0)  0.41840(0)  0.30250(0) 0.0500(0)  iso   H   .   C23   1.00
 H233   0.32530(0)  0.32580(0)  0.31870(0) 0.0500(0)  iso   H   .   C23   1.00
 H241   0.51090(0)  0.24050(0)  0.29490(0) 0.0500(0)  iso   H   .   C24   1.00
 H242   0.58040(0)  0.20510(0)  0.19690(0) 0.0500(0)  iso   H   .   C24   1.00
 H251   0.48920(0)  0.09770(0)  0.21560(0) 0.0500(0)  iso   H   .   C25   1.00
 H252   0.42190(0)  0.13000(0)  0.07280(0) 0.0500(0)  iso   H   .   C25   1.00
 H253   0.35240(0)  0.16540(0)  0.17070(0) 0.0500(0)  iso   H   .   C25   1.00
 H261   0.78530(0)  0.53320(0)  0.30560(0) 0.0500(0)  iso   H   .   C26   1.00
 H262   0.92490(0)  0.47670(0)  0.38360(0) 0.0500(0)  iso   H   .   C26   1.00
 H271   0.82000(0)  0.54130(0)  0.52740(0) 0.0500(0)  iso   H   .   C27   1.00
 H272   0.85040(0)  0.43840(0)  0.52790(0) 0.0500(0)  iso   H   .   C27   1.00
 H273   0.71070(0)  0.49490(0)  0.44990(0) 0.0500(0)  iso   H   .   C27   1.00
 H281   0.85030(0)  0.31520(0)  0.41330(0) 0.0500(0)  iso   H   .   C28   1.00
 H282   0.85800(0)  0.26290(0)  0.28540(0) 0.0500(0)  iso   H   .   C28   1.00
 H291   1.06750(0)  0.24260(0)  0.44660(0) 0.0500(0)  iso   H   .   C29   1.00
 H292   1.04920(0)  0.34480(0)  0.45960(0) 0.0500(0)  iso   H   .   C29   1.00
 H293   1.05680(0)  0.29260(0)  0.33170(0) 0.0500(0)  iso   H   .   C29   1.00
 H301   1.05430(0)  0.29360(0) -0.13290(0) 0.0500(0)  iso   H   .   C30   1.00
 H302   0.92930(0)  0.35270(0) -0.23250(0) 0.0500(0)  iso   H   .   C30   1.00
 H311   1.04050(0)  0.24500(0) -0.34670(0) 0.0500(0)  iso   H   .   C31   1.00
 H312   0.90680(0)  0.22840(0) -0.37950(0) 0.0500(0)  iso   H   .   C31   1.00
 H313   1.03190(0)  0.16930(0) -0.27980(0) 0.0500(0)  iso   H   .   C31   1.00
 H321   0.89900(0)  0.16290(0) -0.04720(0) 0.0500(0)  iso   H   .   C32   1.00
 H322   0.94740(0)  0.13490(0) -0.16210(0) 0.0500(0)  iso   H   .   C32   1.00
 H331   1.12260(0)  0.10070(0)  0.03590(0) 0.0500(0)  iso   H   .   C33   1.00
 H332   1.09190(0)  0.20000(0)  0.08350(0) 0.0500(0)  iso   H   .   C33   1.00
 H333   1.14020(0)  0.17200(0) -0.03140(0) 0.0500(0)  iso   H   .   C33   1.00
 H341   0.43650(0)  0.11970(0) -0.46400(0) 0.0500(0)  iso   H   .   C34   1.00
 H342   0.33630(0)  0.20440(0) -0.43880(0) 0.0500(0)  iso   H   .   C34   1.00
 H351   0.26160(0)  0.07830(0) -0.45850(0) 0.0500(0)  iso   H   .   C35   1.00
 H352   0.28720(0)  0.11990(0) -0.31740(0) 0.0500(0)  iso   H   .   C35   1.00
 H353   0.38730(0)  0.03520(0) -0.34260(0) 0.0500(0)  iso   H   .   C35   1.00
 H361   0.66920(0)  0.10450(0) -0.12930(0) 0.0500(0)  iso   H   .   C36   1.00
 H362   0.56180(0)  0.05490(0) -0.17960(0) 0.0500(0)  iso   H   .   C36   1.00
 H371   0.73010(0) -0.02410(0) -0.24500(0) 0.0500(0)  iso   H   .   C37   1.00
 H372   0.71300(0)  0.05770(0) -0.31790(0) 0.0500(0)  iso   H   .   C37   1.00
 H373   0.60550(0)  0.00820(0) -0.36820(0) 0.0500(0)  iso   H   .   C37   1.00
 H381   0.78340(0)  0.00480(0)  0.09600(0) 0.0500(0)  iso   H   .   C38   1.00
 H382   0.66890(0)  0.08270(0)  0.11280(0) 0.0500(0)  iso   H   .   C38   1.00
 H391   0.83180(0) -0.00600(0)  0.31370(0) 0.0500(0)  iso   H   .   C39   1.00
 H392   0.77880(0)  0.09720(0)  0.33370(0) 0.0500(0)  iso   H   .   C39   1.00
 H401   0.98240(0)  0.10630(0)  0.39080(0) 0.0500(0)  iso   H   .   C40   1.00
 H402   1.02780(0)  0.00710(0)  0.34490(0) 0.0500(0)  iso   H   .   C40   1.00
 H411   0.99180(0)  0.14170(0)  0.20990(0) 0.0500(0)  iso   H   .   C41   1.00
 H412   0.99300(0)  0.04590(0)  0.14690(0) 0.0500(0)  iso   H   .   C41   1.00
 
loop_
    _atom_site_aniso_label
    _atom_site_aniso_U_11
    _atom_site_aniso_U_22
    _atom_site_aniso_U_33
    _atom_site_aniso_U_23
    _atom_site_aniso_U_13
    _atom_site_aniso_U_12

#label   U11         U22         U33         U23         U13         U12

LI1   0.0193(27)  0.0249(28)  0.0242(27)  0.0045(23) -0.0014(23) -0.0067(23)
O1    0.0235(12)  0.0296(13)  0.0279(12)  0.0067(10)  0.0022(10) -0.0073(10)
N1    0.0179(13)  0.0210(14)  0.0186(13)  0.0039(11) -0.0033(11) -0.0070(11)
N2    0.0183(14)  0.0341(16)  0.0243(14)  0.0082(12) -0.0013(11) -0.0101(12)
N3    0.0145(13)  0.0201(13)  0.0192(13)  0.0040(11) -0.0030(10) -0.0063(11)
N4    0.0184(14)  0.0298(16)  0.0290(15) -0.0025(13) -0.0036(12) -0.0071(12)
C1    0.0244(17)  0.0212(16)  0.0232(16) -0.0003(13) -0.0027(14) -0.0113(14)
C2    0.0216(17)  0.0261(18)  0.0279(18)  0.0050(14) -0.0014(14) -0.0082(14)
C3    0.0190(17)  0.0399(21)  0.0270(18)  0.0132(16)  0.0036(14) -0.0010(15)
C4    0.0192(16)  0.0293(18)  0.0213(16)  0.0079(14)  0.0030(14)  0.0006(14)
C5    0.0167(16)  0.0261(17)  0.0199(15)  0.0027(13) -0.0018(13) -0.0069(14)
C6    0.0171(16)  0.0317(19)  0.0267(17)  0.0095(15) -0.0040(14) -0.0098(14)
C7    0.0277(19)  0.0327(19)  0.0221(16)  0.0009(15)  0.0008(14) -0.0098(16)
C8    0.0337(20)  0.0333(20)  0.0309(19)  0.0039(16)  0.0093(16) -0.0050(17)
C9    0.0207(17)  0.0315(18)  0.0202(15)  0.0064(14)  0.0031(13) -0.0065(15)
C10   0.0154(16)  0.0247(17)  0.0211(15)  0.0019(13) -0.0019(13) -0.0093(14)
C11   0.0159(15)  0.0206(16)  0.0204(15)  0.0010(13) -0.0018(12) -0.0060(13)
C12   0.0150(15)  0.0249(16)  0.0263(17)  0.0024(14)  0.0004(13) -0.0087(13)
C13   0.0204(16)  0.0262(17)  0.0234(16)  0.0048(13)  0.0027(13) -0.0085(14)
C14   0.0205(16)  0.0215(16)  0.0210(16)  0.0026(13) -0.0026(13) -0.0085(14)
C15   0.0220(17)  0.0307(18)  0.0187(15)  0.0010(14)  0.0019(13) -0.0119(14)
C16   0.0253(18)  0.0345(19)  0.0205(16) -0.0037(15) -0.0002(14) -0.0122(16)
C17   0.0345(21)  0.0473(23)  0.0305(19)  0.0126(18)  0.0000(17) -0.0104(19)
C18   0.0379(23)  0.0629(28)  0.0330(21)  0.0192(20) -0.0066(18) -0.0210(22)
C19   0.0262(19)  0.0433(22)  0.0386(21)  0.0142(18)  0.0039(16) -0.0104(17)
C20   0.0171(16)  0.0252(17)  0.0291(18) -0.0014(14) -0.0027(14) -0.0057(14)
C21   0.0165(15)  0.0305(18)  0.0179(15)  0.0018(13) -0.0013(13) -0.0067(14)
C22   0.0184(17)  0.0442(22)  0.0263(18)  0.0093(16)  0.0017(14) -0.0070(16)
C23   0.0275(22)  0.1076(44)  0.0326(23)  0.0109(26)  0.0105(19)  0.0050(25)
C24   0.0221(17)  0.0384(20)  0.0220(16)  0.0088(15) -0.0009(14) -0.0101(16)
C25   0.0325(22)  0.0388(22)  0.0627(29)  0.0247(21) -0.0014(20) -0.0130(18)
C26   0.0340(20)  0.0278(18)  0.0309(19) -0.0024(15)  0.0080(16) -0.0144(16)
C27   0.0469(24)  0.0395(22)  0.0327(20) -0.0105(18)  0.0119(19) -0.0181(20)
C28   0.0210(16)  0.0271(17)  0.0186(15)  0.0025(13) -0.0015(13) -0.0107(14)
C29   0.0212(18)  0.0394(21)  0.0307(19)  0.0123(17) -0.0030(15) -0.0050(16)
C30   0.0374(21)  0.0387(21)  0.0280(18)  0.0035(16)  0.0098(16) -0.0144(17)
C31   0.0558(27)  0.0562(27)  0.0322(21) -0.0002(19)  0.0223(20) -0.0200(23)
C32   0.0178(16)  0.0299(18)  0.0210(16)  0.0026(14)  0.0029(13) -0.0068(14)
C33   0.0230(18)  0.0372(20)  0.0279(18)  0.0035(16)  0.0034(15) -0.0055(16)
C34   0.0196(17)  0.0343(19)  0.0254(17) -0.0012(15) -0.0040(14) -0.0142(15)
C35   0.0291(20)  0.0358(21)  0.0451(23) -0.0035(18)  0.0014(18) -0.0187(17)
C36   0.0264(18)  0.0310(19)  0.0220(16)  0.0043(14)  0.0013(14) -0.0061(15)
C37   0.0337(20)  0.0338(20)  0.0272(19) -0.0022(16)  0.0004(16) -0.0066(17)
C38   0.0315(20)  0.0289(19)  0.0422(22)  0.0000(16)  0.0095(17) -0.0137(16)
C39   0.0426(24)  0.0551(27)  0.0457(25)  0.0254(22)  0.0118(20) -0.0102(21)
C40   0.0371(22)  0.0415(23)  0.0345(21)  0.0112(18)  0.0011(18) -0.0094(19)
C41   0.0225(18)  0.0339(19)  0.0307(19)  0.0054(16)  0.0007(15) -0.0066(16)

loop_
_geom_bond_atom_site_label_1
_geom_bond_atom_site_label_2
_geom_bond_distance
_geom_bond_publ_flag
 
                      LI1   O1      2.059(7)   yes
                      LI1   N1      2.309(6)   yes
                      LI1   N2      2.201(7)   yes
                      LI1   N3      2.059(8)   yes
                      O1    C38     1.441(6)   yes
                      O1    C41     1.441(4)   yes
                      N1    C1      1.331(4)   yes
                      N1    C4      1.431(4)   yes
                      N2    C6      1.432(4)   yes
                      N2    C9      1.315(5)   yes
                      N3    C11     1.379(4)   yes
                      N3    C14     1.378(5)   yes
                      N4    C16     1.332(6)   yes
                      N4    C20     1.352(4)   yes
                      C1    C2      1.437(4)   yes
                      C1    C21     1.519(5)   yes
                      C2    C3      1.350(6)   yes
                      C3    C4      1.458(4)   yes
                      C4    C5      1.521(6)   yes
                      C4    C6      1.640(5)   yes
                      C5    C6      1.496(6)   yes
                      C5    C22     1.529(5)   yes
                      C5    C24     1.527(5)   yes
                      C6    C7      1.463(5)   yes
                      C7    C8      1.376(6)   yes
                      C8    C9      1.460(5)   yes
                      C9    C10     1.516(5)   yes
                      C10   C11     1.520(6)   yes
                      C10   C26     1.537(5)   yes
                      C10   C28     1.547(5)   yes
                      C11   C12     1.391(6)   yes
                      C12   C13     1.403(5)   yes
                      C13   C14     1.390(5)   yes
                      C14   C15     1.515(5)   yes
                      C15   C16     1.527(4)   yes
                      C15   C30     1.536(7)   yes
                      C15   C32     1.551(5)   yes
                      C16   C17     1.416(6)   yes
                      C17   C18     1.367(6)   yes
                      C18   C19     1.375(8)   yes
                      C19   C20     1.380(6)   yes
                      C20   C21     1.534(6)   yes
                      C21   C34     1.536(4)   yes
                      C21   C36     1.542(4)   yes
                      C22   C23     1.510(7)   yes
                      C24   C25     1.517(7)   yes
                      C26   C27     1.522(8)   yes
                      C28   C29     1.525(5)   yes
                      C30   C31     1.536(7)   yes
                      C32   C33     1.522(4)   yes
                      C34   C35     1.531(7)   yes
                      C36   C37     1.508(6)   yes
                      C38   C39     1.532(6)   yes
                      C39   C40     1.528(7)   yes
                      C40   C41     1.528(7)   yes
 
loop_
_geom_angle_atom_site_label_1
_geom_angle_atom_site_label_2
_geom_angle_atom_site_label_3
_geom_angle
_geom_angle_publ_flag
 
                       N2    LI1   N3       92.3(3)  yes
                       N1    LI1   N3      142.3(4)  yes
                       N1    LI1   N2       77.9(3)  yes
                       O1    LI1   N3      114.6(4)  yes
                       O1    LI1   N2      112.4(4)  yes
                       O1    LI1   N1      102.7(3)  yes
                       LI1   O1    C41     126.7(4)  yes
                       LI1   O1    C38     126.7(4)  yes
                       C38   O1    C41     104.2(4)  yes
                       LI1   N1    C4      112.3(3)  yes
                       LI1   N1    C1      122.7(4)  yes
                       C1    N1    C4      105.3(4)  yes
                       LI1   N2    C9      113.3(4)  yes
                       LI1   N2    C6      116.9(4)  yes
                       C6    N2    C9      106.7(4)  yes
                       LI1   N3    C14     130.7(4)  yes
                       LI1   N3    C11     123.6(4)  yes
                       C11   N3    C14     105.3(4)  yes
                       C16   N4    C20     119.4(5)  yes
                       N1    C1    C21     123.4(4)  yes
                       N1    C1    C2      112.0(4)  yes
                       C2    C1    C21     124.5(5)  yes
                       C1    C2    C3      107.7(5)  yes
                       C2    C3    C4      106.3(4)  yes
                       N1    C4    C3      108.6(4)  yes
                       C3    C4    C6      123.0(4)  yes
                       C3    C4    C5      121.1(4)  yes
                       N1    C4    C6      116.4(4)  yes
                       N1    C4    C5      123.1(4)  yes
                       C5    C4    C6       56.4(3)  yes
                       C4    C5    C24     117.8(4)  yes
                       C4    C5    C22     114.8(4)  yes
                       C4    C5    C6       65.8(3)  yes
                       C22   C5    C24     116.3(4)  yes
                       C6    C5    C24     116.2(4)  yes
                       C6    C5    C22     116.5(4)  yes
                       C4    C6    C5       57.8(3)  yes
                       N2    C6    C5      117.4(4)  yes
                       N2    C6    C4      113.0(4)  yes
                       C5    C6    C7      127.3(4)  yes
                       C4    C6    C7      124.0(4)  yes
                       N2    C6    C7      108.8(4)  yes
                       C6    C7    C8      105.5(4)  yes
                       C7    C8    C9      107.4(4)  yes
                       N2    C9    C8      111.4(5)  yes
                       C8    C9    C10     128.6(4)  yes
                       N2    C9    C10     119.9(4)  yes
                       C9    C10   C28     109.9(4)  yes
                       C9    C10   C26     110.2(4)  yes
                       C9    C10   C11     105.8(4)  yes
                       C26   C10   C28     111.0(4)  yes
                       C11   C10   C28     109.2(4)  yes
                       C11   C10   C26     110.6(4)  yes
                       N3    C11   C10     120.0(4)  yes
                       C10   C11   C12     128.9(5)  yes
                       N3    C11   C12     111.0(4)  yes
                       C11   C12   C13     106.2(4)  yes
                       C12   C13   C14     106.7(4)  yes
                       N3    C14   C13     110.8(4)  yes
                       C13   C14   C15     127.9(4)  yes
                       N3    C14   C15     121.3(4)  yes
                       C14   C15   C32     110.2(4)  yes
                       C14   C15   C30     109.8(4)  yes
                       C14   C15   C16     108.3(4)  yes
                       C30   C15   C32     109.3(4)  yes
                       C16   C15   C32     108.7(4)  yes
                       C16   C15   C30     110.5(4)  yes
                       N4    C16   C15     117.1(4)  yes
                       C15   C16   C17     121.1(4)  yes
                       N4    C16   C17     121.8(5)  yes
                       C16   C17   C18     118.6(5)  yes
                       C17   C18   C19     118.6(6)  yes
                       C18   C19   C20     121.1(5)  yes
                       N4    C20   C19     120.4(5)  yes
                       C19   C20   C21     124.2(5)  yes
                       N4    C20   C21     115.4(4)  yes
                       C1    C21   C20      99.6(4)  yes
                       C20   C21   C36     111.6(4)  yes
                       C20   C21   C34     111.0(4)  yes
                       C1    C21   C36     112.1(4)  yes
                       C1    C21   C34     110.3(4)  yes
                       C34   C21   C36     111.7(4)  yes
                       C5    C22   C23     114.2(4)  yes
                       C5    C24   C25     112.8(4)  yes
                       C10   C26   C27     115.1(4)  yes
                       C10   C28   C29     113.3(4)  yes
                       C15   C30   C31     115.3(5)  yes
                       C15   C32   C33     113.0(4)  yes
                       C21   C34   C35     113.8(4)  yes
                       C21   C36   C37     113.6(4)  yes
                       O1    C38   C39     103.6(4)  yes
                       C38   C39   C40     103.0(5)  yes
                       C39   C40   C41     104.8(5)  yes
                       O1    C41   C40     105.2(4)  yes
 
_refine_diff_density_max          0.544
_refine_diff_density_min          -0.305
_refine_diff_density_rms          0.065
